# Supplementary material for: Enhanced electrocatalytic activity and selectivity of glycerol oxidation triggered by nanoalloyed silver–gold nanocages directly grown on gas diffusion electrodes
Source: Royal Society of Chemistry journal article supplement (doi:10.1039/d0ta01063d), 2020-01-01
Supplement: d0ta01063d1.pdf [file d0ta01063d1.pdf]

*Electronic Supporting Information (ESI) for*

Enhanced electrocatalytic activity and selectivity of glycerol oxidation triggered by nanoalloyed silver-gold nanocages directly grown onto gas diffusion electrodes

Rihab Boukil,<sup>†</sup> Nazym Tuleushova,<sup>†</sup> Didier Cot,<sup>†</sup> Bertrand Rebiere,<sup>‡</sup> Valerie Bonniol,<sup>†</sup> Julien Cambedouzou,<sup>†</sup> Sophie Tingry,<sup>†</sup> David Cornu,<sup>†</sup> and Yaovi Holade<sup>†,\*</sup>

<sup>†</sup>Institut Européen des Membranes, IEM UMR 5635, Univ Montpellier, ENSCM, CNRS, Montpellier, France.

<sup>‡</sup>Institut Charles Gerhardt Montpellier, UMR 5253, Univ Montpellier, ENSCM, CNRS, Montpellier, France

\*Corresponding author (Y. H): E-mail: [yaovi.holade@enscm.fr](mailto:yaovi.holade@enscm.fr)

# TABLE OF CONTENTS

|                                                                                                                                                |    |
|------------------------------------------------------------------------------------------------------------------------------------------------|----|
| EXPERIMENTAL SECTION .....                                                                                                                     | 4  |
| Chemicals and Materials .....                                                                                                                  | 4  |
| Pulse Electrodeposition of Ag onto 3D GDE: GDE@Ag.....                                                                                         | 4  |
| Galvanic Replacement (GR) of Ag by Au at a GDE: GDE@AgAu.....                                                                                  | 6  |
| Material Characterizations. ....                                                                                                               | 6  |
| Electrochemical Measurements.....                                                                                                              | 7  |
| SUPPLEMENTARY TABLES.....                                                                                                                      | 11 |
| Table S1. Quantitative data from EDX of the CP-Ag material.....                                                                                | 11 |
| Table S2. Quantitative data from EDX of CP-AgAu-GR(KNO <sub>3</sub> )-10min material.....                                                      | 11 |
| Table S3. Quantitative data from EDX of CP-AgAu-GR(KNO <sub>3</sub> )-30min material.....                                                      | 12 |
| Table S4. Quantitative data from EDX of CP-AgAu-GR(H <sub>2</sub> O)-10 min material.....                                                      | 12 |
| Table S5. Quantitative data from EDX of CP-AgAu-GR(H <sub>2</sub> O)-5min material.....                                                        | 13 |
| Table S6. Comparative performance of relevant glycerol electrooxidation reaction on metallic catalysts in alkaline media from literature. .... | 13 |
| Table S7. Fitted EIS data from the used equivalent electrical circuit ( $R_{\Omega}+Q_{CPE}/R_{ct}$ ).....                                     | 15 |
| Table S8. Fitted EIS data from the used equivalent electrical circuit ( $R_{\Omega}+Q_{CPE}/R_{ct}$ ). ....                                    | 15 |
| Table S9. Fitted EIS data from the used equivalent electrical circuit ( $R_{\Omega}+Q_{CPE}/R_{ct}$ ).....                                     | 16 |
| Table S10. Electrochemical kinetics data from the electrodes surface probing using the redox couple $Fe(CN)_6^{3-}/Fe(CN)_6^{4-}$ . ....       | 16 |
| Table S11. Fitted EIS data from the used equivalent electrical circuit " $R_{\Omega}+Q_{CPE}/(R_{ct}+W)$ ". ....                               | 17 |
| Table S12. Quantitative data from EDX of CP-AgAu-GR(H <sub>2</sub> O)-washed(NaCl)-5min material.....                                          | 17 |
| Table S13. Quantitative data from EDX of CP-AgAu-GR(NaCl)-5min material .....                                                                  | 18 |
| Table S14. Quantitative data from the electrolysis and HPLC of GDE@AgAu material. ..                                                           | 18 |
| Table S15. Post-mortem quantitative data from EDX of CP-AgAu-GR(NaCl)-5min material after 3 h of bulk electrolysis.....                        | 19 |
| SUPPLEMENTARY FIGURES .....                                                                                                                    | 20 |
| Method for Ag Nanostructured Particles Growth at GDE. ....                                                                                     | 20 |
| Fig. S1. The developed method for the direct growth of Ag NPs onto the surface of GDE.                                                         | 20 |
| Fig. S2. CV for the calibration of the reference electrode. ....                                                                               | 21 |
| Characterization of the used GDE.....                                                                                                          | 22 |
| Fig. S3. SEM/HRSEM pictures of the used GDE-based carbon paper (AvCarb MGL190, 190 $\mu$ m thickness). ....                                    | 22 |

|                                                                                                                                                                                                                                                                             |    |
|-----------------------------------------------------------------------------------------------------------------------------------------------------------------------------------------------------------------------------------------------------------------------------|----|
| Fig. S4. SEM micrographs of Ag grown onto a GDE for different ratios $R = n(\text{NH}_4\text{OH})/n(\text{AgNO}_3)$ .....                                                                                                                                                   | 23 |
| Fig. S5. Overview SEM micrographs of Ag grown onto a GDE for the ratio $R = n(\text{NH}_4\text{OH})/n(\text{AgNO}_3) = 4$ .....                                                                                                                                             | 24 |
| Fig. S6. SEM/HRSEM micrographs of Ag grown onto a GDE for the ratio $R = n(\text{NH}_4\text{OH})/n(\text{AgNO}_3) = 4$ to illustrate the deposition within the 3D structure of GDE. ....                                                                                    | 25 |
| Fig. S7. EDX analysis of Ag grown onto a GDE for the ratio $R = n(\text{NH}_4\text{OH})/n(\text{AgNO}_3) = 4$ .....                                                                                                                                                         | 26 |
| Fig. S8. EDX mapping of Ag grown onto a GDE for the ratio $R = n(\text{NH}_4\text{OH})/n(\text{AgNO}_3) = 4$ .....                                                                                                                                                          | 27 |
| Fig. S9. Performance and characterization of the as-synthesized GDE@AgAu materials by the galvanic replacement (GR) performed in $\text{KNO}_3$ .....                                                                                                                       | 28 |
| Fig. S10. Characterization of the as-synthesized GDE@AgAu materials for the galvanic replacement (GR) performed in $\text{KNO}_3$ . ....                                                                                                                                    | 29 |
| Fig. S11. EDX spectrum of the as-synthesized CP-AgAu-GR( $\text{KNO}_3$ )-10min material.....                                                                                                                                                                               | 30 |
| Fig. S12. EDX spectrum of the as-synthesized CP-AgAu-GR( $\text{KNO}_3$ )-30min material.....                                                                                                                                                                               | 31 |
| Fig. S13. EDX spectrum of the as-synthesized CP-AgAu-GR( $\text{H}_2\text{O}$ )-10min material.....                                                                                                                                                                         | 31 |
| Fig. S14. EDX spectrum of the as-synthesized CP-AgAu-GR( $\text{H}_2\text{O}$ )-5min material.....                                                                                                                                                                          | 32 |
| Fig. S15. SEM/HRSEM analysis of the as-synthesized GDL@Au materials referred to as “CP-Au”. ....                                                                                                                                                                            | 33 |
| Fig. S16. Electrochemical characterization of the as-synthesized GD@AgAu material is the “CP-AgAu-GR( $\text{NaCl}$ )-5min.....                                                                                                                                             | 34 |
| Figure S17. EIS characterization in 1 M KOH + 0.1 glycerol at 25 °C.....                                                                                                                                                                                                    | 36 |
| Fig. S18. Electrochemical characterization of the pristine CP, bulk Pt and the as-fabricated CP-Ag (GDE@Ag) and CP-AgAu (GDE@AuAg) materials in 0.5 M $\text{KNO}_3$ + 1 mM $\text{K}_3[\text{Fe}(\text{CN})_6]$ at 25 °C. ....                                             | 37 |
| Fig. S19. Modeling curve of $n \times \Delta E_p$ vs. $\psi$ (log-scale for $\psi$ ) for the determination of the kinetics data from the analysis of the peak separation, $\Delta E_p$ between the anodic and cathodic peaks on a CV. ....                                  | 38 |
| Fig. S20. SEM/HRSEM micrographs for the as-synthesized GDE@AgAu materials by the galvanic replacement (GR) performed in $\text{H}_2\text{O}$ (5 min) and subsequently washed with a brine solution, referred to as GR( $\text{H}_2\text{O}$ )-washed( $\text{NaCl}$ ) ..... | 39 |
| Fig. S21. SEM/HRSEM micrographs for the as-synthesized GDE@AgAu materials by the galvanic replacement (GR) performed in a brine solution (5 min), referred to as GR( $\text{NaCl}$ ). ....                                                                                  | 40 |
| Fig. S22. EDX spectrum of the as-synthesized CP-AgAu-GR( $\text{H}_2\text{O}$ )-washed( $\text{NaCl}$ )-5min material.....                                                                                                                                                  | 41 |
| Fig. S23. EDX spectrum of the as-synthesized CP-AgAu-GR( $\text{NaCl}$ )-5min material. ....                                                                                                                                                                                | 41 |
| Fig. S24. XPS characterization of the as-prepared materials. ....                                                                                                                                                                                                           | 42 |
| Fig. S25. Overview of the chromatograms obtained from HPLC analysis.....                                                                                                                                                                                                    | 43 |
| Fig. S26. Post-mortem SEM and EDX of the as-synthesized CP-AgAu-GR( $\text{NaCl}$ )-5min material after 3 h of bulk electrolysis.....                                                                                                                                       | 44 |

|                                                                                                                                                                      |    |
|----------------------------------------------------------------------------------------------------------------------------------------------------------------------|----|
| Scheme S1. Proposed reaction scheme for glycerol electrooxidation in alkaline medium on the as-synthesized silver-gold nanoporous and nanoalloyed nanocatalysts..... | 45 |
| References .....                                                                                                                                                     | 46 |

## EXPERIMENTAL SECTION

### Chemicals and Materials

GDE-based carbon paper (AvCarb MGL190, 190  $\mu\text{m}$  thickness) was purchased from Fuel Cell Earth LL (USA). Ethanol (EtOH, VWR, 100%), potassium hydroxide (KOH, 99.98% (trace metal basis), Acros Organics), potassium nitrate ( $\text{KNO}_3$ , Sigma-Aldrich, 99.0% min), silver nitrate ( $\text{AgNO}_3$ , Premium<sup>®</sup>, 99.9995% (metals basis), Alfa Aesar), trihydrate tetrachloroauric (III) acid ( $\text{HAuCl}_4 \cdot 3\text{H}_2\text{O}$ , 99.9%, Sigma-Aldrich), ammonia solution (30%, For analysis-ACS, Carlo Erba Reagents), sodium chloride ( $\text{NaCl}$ ,  $\geq 99.5\%$  (AT) ACS, Sigma-Aldrich), D-(+)-glucose (99.5%, Sigma-Aldrich), potassium hexacyanoferrate ( $\text{K}_3[\text{Fe}(\text{CN})_6]$ ,  $\geq 99.0\%$ , Sigma-Aldrich), isopropanol ( $\text{iPrOH}$ ,  $\geq 99.5\%$ , Sigma-Aldrich), Commercial catalyst is Au/C (20 wt%,  $\approx 4$  nm particles size, Premetek Co., USA) were used as-received. All used nitrogen ( $\text{N}_2$ ) gas was ultrapure (Air Liquide, France) and all named ultrapure water (MQ) is provided by Milli-Q Millipore source (18.2  $\text{M}\Omega$  cm at 20  $^\circ\text{C}$ ).

### Pulse Electrodeposition of Ag onto 3D GDE: GDE@Ag

*Preliminary steps.* The as-received GDE electrodes were in a T-shape to yield 3 cm high, 3 cm width, and 0.19 mm thickness. Enough space on the top is reserved for further electrical wiring with gold during the electroplating. The as-cut electrodes have been washed 3 $\times$  by  $\text{iPrOH}$  under middle-shaking (5 min per round) using an orbital shaker (RSLAB-7PRO, RS Lab) followed by drying in an oven at 50  $^\circ\text{C}$  (1 h is fine), and referred to as CP. For particles deposition onto one face of CP, an electroplating tape (3M Company) was used so that the working geometric area is 9  $\text{cm}^2$ ; however, given its 3D morphology, it is obvious that the

real geometric surface area is larger than that value. The engineered double-jacket electrochemical reactor in a three-electrode configuration has working setups of 200 mL volume (note that the full capacity is about 300 mL) and 25 °C temperature. The above CP acts as the working electrode (WE, 9 cm<sup>2</sup>). A 22 cm<sup>2</sup> glassy carbon plate serves as the counter electrode (CE, Alfa Aesar). A mercury-mercurous sulfate (Hg|Hg<sub>2</sub>SO<sub>4</sub>|K<sub>2</sub>SO<sub>4</sub> saturated, MSE, Radiometer) acts as the reference electrode (RE). The WE-CE and WE-RE distances are about 2 and 0.5 cm, respectively.

*Synthesis of GDE@Ag: Effect of the ammonia.* 194 mL of 200 mM KNO<sub>3</sub>, 6 mL of a stock solution of 5 mM AgNO<sub>3</sub> (prepared in 200 mM KNO<sub>3</sub>) and different volumes of 0 or 15.6 µL of NH<sub>4</sub>OH (for  $R = n(\text{NH}_4\text{OH})/n(\text{AgNO}_3) = 0, 4$ ) are gently stirred while outgassing for about 15 min. The switchable electroplating program (SP-150 potentiostat, Biologic Science Instruments) is composed of an OFF step ( $j_{\text{appl}} = 0 \text{ mA cm}^{-2}$ ,  $t_{\text{OFF}} = 5 \text{ s}$ ), an ON step ( $I_{\text{appl}} = -4.5 \text{ mA}$ , i.e.,  $j_{\text{appl}} = -0.5 \text{ mA cm}^{-2}$ ,  $t_{\text{ON}} = 5 \text{ s}$ ) and a total cycles of  $N_{\text{cycles}} = 126$ . After synthesis, the samples were thoroughly rinsed with MQ water and dried in oven at 50 °C overnight. Once dried, the scotch tape easily peeled off. The obtained free-standing catalysts are labeled as CP-Ag-R0 and CP-Ag-R4. Caution: Experiments involving the ammonia were done under a hood to prevent the release of the gaseous NH<sub>3</sub> directly in the Lab.

*Synthesis of GDL@Ag: Effect of [AgNO<sub>3</sub>].* Syntheses were performed as described above by changing the sampled volume of the stock solution of 5 mM AgNO<sub>3</sub> to yield 150 and 300 µM (filling to 200 mL working volume with NH<sub>4</sub>OH ( $R = 4$ ) and 200 mM KNO<sub>3</sub>) and the total cycles of  $N_{\text{cycles}} = 126$  or 252 for the two concentrations of AgNO<sub>3</sub>.

## **Galvanic Replacement (GR) of Ag by Au at a GDE: GDE@AgAu**

Typically, the above GDL@Ag electrode resulting from  $R = 4$  and 300  $\mu\text{M}$   $\text{AgNO}_3$  is equally cut into an L-shape “template sub-electrodes” of 3 cm high and 1.5 cm width (0.19 mm thickness). The working volume of the GR reactor is 15 mL, composed of 1460  $\mu\text{L}$  of 5 mM  $\text{HAuCl}_4$  stock solution (prepared in the filling solution) and 13.540 mL filling solution. Samples obtained using the filling solution of 0.2 M  $\text{KNO}_3$ , MQ water and 3.5 M  $\text{NaCl}$  are referred to as GR( $\text{KNO}_3$ ), GR( $\text{H}_2\text{O}$ ) and GR( $\text{NaCl}$ ), respectively. GR is performed using the aforementioned middle-shaking at room temperature (RT, about  $25 \pm 2$  °C at that time). For the time dependent experiments, the reaction is quenched after different residence periods going from 2 min to 24 h. Once the threshold time is reached, the solution is swiftly replaced (this is done in the next 10 s) by the flushing solution, the rinsing which has been done at least 3 times by shaking the contents. Two strategies for the rinsing solution of MQ water and the above brine (3.5 M  $\text{NaCl}$ ) have been considered. Once washed, the free-standing GDL@AgAu sample is dried in oven at 50 °C overnight. For the monitoring of the open circuit potential (OCP) during GR( $\text{NaCl}$ ), a tiny reference electrode ( $\text{Ag}/\text{AgCl}$ , CH Instruments, Inc.) is used, the solution is gently stirred and the potential is recorded.

## **Material Characterizations**

Scanning electron microscope (SEM) was performed on a Hitachi S-4800 microscope. ZEISS EVOHD 15 microscope was used for energy-dispersive X-ray (EDX) analyses. To enhance the SEM/HRSEM imaging capability, a thin layer (1-5 nm) of carbon or platinum was coated on the samples. Inductively coupled plasma optical emission spectrometry (ICP-OES) analysis was performed on a spectrometer Optima 2000 DV (PerkinElmer). X-ray photoelectron spectroscopy (XPS) was fulfilled on an ESCALAB 250 spectrometer (Thermo Electron) equipped with a monochromatic radiation source  $\text{Al-K}\alpha$  (1486.6 eV). Survey

spectra were collected with a step of 1 eV (transition energy: 150 eV) and high-resolution spectra were recorded at a step of 0.1 eV (transition energy: 20 eV). The measurement of binding energy (BE) was corrected based on the energy of C 1s at 284.4 eV and quantifications were carried out from the corresponding XPS peak area after correction with suitable sensitivity factor. SAXS experiments were conducted in transmission geometry on a set-up involving a Mo source associated with Fox3D optics (XENOCs), delivering a monochromatic beam of wavelength = 0.71 Å. A MAR345 detector was used and the intensity was integrated around the central pixel of the detector according to a standard procedure for data treatment. After proper intensity calibration using high density polyethylene, absolute intensity was normalized to the width of the sample.

## Electrochemical Measurements

*Electrochemical setup and characterization.* The entire electrochemical tests were fulfilled in a conventional three-electrode cell using the above potentiostat. The working electrode was a CP-based electrode cut into L-shape of 0.5 cm high and 0.5 cm width, leading to an area of 0.25 cm<sup>2</sup> (not taking into account the 3D structure of the GDE) and enough space on the top for electrical wiring with gold. A slab of glassy carbon plate (12.4 cm<sup>2</sup>) was used as the counter electrode. Mercury-mercury oxide electrode (Hg|HgO|KOH 1 M, MOE, RE-61AP Reference Electrode for alkaline solution, BAS Inc.) was used as the reference electrode and was separated from the solution by a Haber-Luggin capillary tip. However, the majority of the potentials were scaled versus the reversible hydrogen electrode (RHE) according to the calibration relationship  $E(\text{V vs RHE}) = E(\text{V vs MOE}) + \Delta E$ .  $\Delta E = 0.946 \text{ V}$  at 25 °C in 1 M KOH according to the calibrating curve reported in Fig. S2. Typically, a steady-state CV was recorded in H<sub>2</sub>-saturated 1 M KOH at 1 mV s<sup>-1</sup> by connecting a Pt plate as the working electrode, a Pt mesh as the counter electrode and that MOE as the reference electrode. The

average of the two potentials at which the current crosses zero was taken to be the thermodynamic potential for the hydrogen electrode reactions (oxidation and evolution). The catalytic ink preparation for the commercial iPrOH isopropanol and 20  $\mu\text{L}$  of Nafion<sup>®</sup> suspension were ultrasonically mixed. Then, about 0.5 mg of the commercial catalyst (Au/C powder, 20 wt%,  $\approx 4$  nm particles size, Premetek Co., USA) was added. Finally, 8.4  $\mu\text{L}$  of the homogeneous ink was drop-casted onto each face of a bare L-shape CP electrode of 0.5 cm height and 0.5 cm width and dried at room temperature. The estimated area of both sides is thus 0.5  $\text{cm}^2$  (not taking into account the 3D structure of the GDE) and enough space on the top for electrical connection with a gold wire. The Au value assessed by ICP being 19 wt.%, the loading was 16  $\mu\text{g}_{\text{Au}} \text{cm}^{-2}$ . Au/C is further referred in the main text as “Vulcan-Au”.

*Performance towards glycerol electrocatalysis.* The glycerol (0.1 M) electrooxidation reaction was investigated by the methods of cyclic voltammetry (CV) and potentiostatic electrochemical impedance spectroscopy (EIS). EIS was performed at different electrodes potentials by scanning frequencies from 100 kHz to 25 mHz (10 mV amplitude). All the voltammograms are iR-free, i.e., corrected by the “potential drop” between the working and reference electrodes according to the relationship  $E_{\text{real}} = E_{\text{applied}} - R_{\Omega} \times I$ .  $R_{\Omega}$  is obtained by EIS at the intersection between the Nyquist curve and x-axis at high frequencies.

*Electrochemical characterization by the redox probe  $\text{Fe}(\text{CN})_6^{3-}/\text{Fe}(\text{CN})_6^{4-}$ .* The previous conditions were slightly modified. Since Ag or AgAu were deposited only onto 1 face, the electroplating tape (3M Company) was applied on the remaining surface to allow a rational comparison towards the redox probe  $\text{Fe}(\text{CN})_6^{3-}/\text{Fe}(\text{CN})_6^{4-}$  that can react on both surfaces, which was not the case of glycerol. The same precaution applies for the control sample of CP. A Pt plate of 5 mm  $\times$  4 mm (both surfaces are active) was also used for comparison. The



reference electrode was a calomel saturated electrode ( $\text{Hg}|\text{Hg}_2\text{Cl}_2|\text{KCl}$  saturated, SCE, SI Analytics). The experiments were performed in 0.5 M  $\text{KNO}_3$  electrolyte in the presence of  $\text{K}_3[\text{Fe}(\text{CN})_6]$  substrate at 1 mM.

*Electrolysis and high-performance liquid chromatography (HPLC).* Electrolysis was fulfilled in a single compartment cell (double-jacket for the temperature control). We did not observe any change of the reaction products distribution during control experiments in an H-type cell, wherein the two compartments were separated with an anion-exchange membrane: fumapem<sup>®</sup> FAA-3-50, 45-50  $\mu\text{m}$  thickness, Fuel Cell Store. The electrochemical measurements were conducted using the above potentiostat. The volume of the electrolysis was 25 mL and the temperature was fixed at 25 °C. The solution was gently stirred. The above CP@AgAu obtained by galvanic displacement in the presence of brine solution was the working electrode (cut into L-shape of 2 cm high and 1 cm width). A 22  $\text{cm}^2$  glassy carbon plate and  $\text{Hg}|\text{HgO}|\text{KOH}$  1 M (MOE, RE-61AP Reference Electrode for alkaline solution, BAS Inc.) served as counter and reference electrodes, respectively. Given the 3D structure of the working electrode, we constructed a specific programmed potential electrolysis (PPE). The PPE setup consisted of two potential levels: a first potential plateau of 10 s (OFF) is fixed at  $E = \text{OCP}$  for the electrode relaxation and a second one of 10 s (ON) was set at  $E = E_{\text{ox}} = 0.3 \text{ V}$  vs MOE (= 1.246 V vs RHE with no  $iR$ -drop correction, with  $iR$  correction, it would be ca. 0.94 vs RHE). The first plateau allows products to diffuse out of the electrode surface while the second one performed the electrooxidation of organic molecules at the surface. This program is repeated 540 times for 3 hours electrolysis experiments. The final products of glycerol electrooxidation were determined by analyzing collected samples with high-performance liquid chromatography (HPLC, Dionex ICS-1000). The injected volume is 25  $\mu\text{L}$ , the column is BP-OA Benson 2000-0, which operated at room temperature. The analytes

were separated with diluted sulfuric acid ( $3 \text{ mmol L}^{-1} \text{ H}_2\text{SO}_4$ ) used as eluent at  $0.4 \text{ mL min}^{-1}$  flow rate. The chromatograph was equipped with an UV-vis detector ( $\lambda = 210 \text{ nm}$ ). The assignments of the different peaks and the quantitative determination of the products were done with external standards, that is, by comparing the retention times with those of reference samples prepared with the expected products of glycerol electrooxidation.<sup>3-6</sup>

## SUPPLEMENTARY TABLES

**Table S1.** Quantitative data from EDX of the CP-Ag material.

| Entry   | CP-Ag  |       |       |         |     |
|---------|--------|-------|-------|---------|-----|
|         | test1  | test2 | test3 | average | SD  |
|         | weight |       |       |         |     |
| C(wt%)  | 51.83  | 43.99 | 47.56 | 47.8    | 3.9 |
| O(wt%)  | 2.04   | 1.75  | 1.75  | 1.8     | 0.2 |
| Ag(wt%) | 46.12  | 54.25 | 50.70 | 50.4    | 4.1 |
|         | atomic |       |       |         |     |
|         | test1  | test2 | test3 | average | SD  |
|         | weight |       |       |         |     |
| C(at%)  | 88.6   | 85.67 | 87.24 | 87.2    | 1.5 |
| O(at%)  | 2.62   | 2.56  | 2.41  | 2.5     | 0.1 |
| Ag(at%) | 8.78   | 11.76 | 10.36 | 10.3    | 1.5 |

**Comments:** Since the carbon amount is largely underestimated (working principle of EDX that analyses only the surface), the actual silver content is highly overestimated. Indeed, it can be seen from Figs. S4 and S5 that Ag particles cover only the first three layers of microfibers of the GDE on a total of 27-21 layers.

**Table S2.** Quantitative data from EDX of CP-AgAu-GR(KNO<sub>3</sub>)-10min material

| Entry                                   | RG(KNO <sub>3</sub> )-10min |       |       |             |            |
|-----------------------------------------|-----------------------------|-------|-------|-------------|------------|
|                                         | test1                       | test2 | test3 | average     | SD         |
|                                         | weight                      |       |       |             |            |
| C(wt%)                                  | 74.97                       | 72.56 | 74.85 | <b>74.1</b> | <b>1.4</b> |
| O(wt%)                                  | 2.55                        | 2.98  | 2.64  | <b>2.7</b>  | <b>0.2</b> |
| Cl(wt%)                                 | 2.06                        | 2.22  | 2.23  | <b>2.2</b>  | <b>0.1</b> |
| K(wt%)                                  | 0.00                        | 0.00  | 0.00  | <b>0.0</b>  | <b>0.0</b> |
| Ag(wt%)                                 | 12.95                       | 15.30 | 13.78 | <b>14.0</b> | <b>1.2</b> |
| Au(wt%)                                 | 7.47                        | 6.94  | 6.50  | <b>7.0</b>  | <b>0.5</b> |
|                                         | atomic                      |       |       |             |            |
|                                         | test1                       | test2 | test3 | average     | SD         |
|                                         | weight                      |       |       |             |            |
| C(at%)                                  | 94.33                       | 93.41 | 94.13 | <b>94.0</b> | <b>0.5</b> |
| O(at%)                                  | 2.4                         | 2.88  | 2.49  | <b>2.6</b>  | <b>0.3</b> |
| Cl(at%)                                 | 0.88                        | 0.97  | 0.95  | <b>0.9</b>  | <b>0.0</b> |
| K(at%)                                  | 0                           | 0     | 0     | <b>0.0</b>  | <b>0.0</b> |
| Ag(at%)                                 | 1.81                        | 2.19  | 1.93  | <b>2.0</b>  | <b>0.2</b> |
| Au(at%)                                 | 0.57                        | 0.54  | 0.5   | <b>0.5</b>  | <b>0.0</b> |
| Ag <sub>100-x</sub> Au <sub>x</sub> x = | 24                          | 20    | 21    | <b>21.4</b> | <b>2.2</b> |

**Table S3.** Quantitative data from EDX of CP-AgAu-GR(KNO<sub>3</sub>)-30min material

| Entry                                   | RG(KNO <sub>3</sub> )-30min |       |       |       |             |            |
|-----------------------------------------|-----------------------------|-------|-------|-------|-------------|------------|
|                                         | test1                       | test2 | test3 | test4 | average     | SD         |
|                                         | weight                      |       |       |       |             |            |
| C(wt%)                                  | 54.91                       | 53.91 | 55.83 | 56.94 | <b>55.4</b> | <b>1.3</b> |
| O(wt%)                                  | 0.8                         | 1.59  | 1.46  | 1.55  | <b>1.4</b>  | <b>0.4</b> |
| Cl(wt%)                                 | 6.5                         | 6.60  | 6.70  | 6.28  | <b>6.5</b>  | <b>0.2</b> |
| K(wt%)                                  | 0.09                        | 0.17  | 0.00  | 0.00  | <b>0.1</b>  | <b>0.1</b> |
| Ag(wt%)                                 | 26.16                       | 26.05 | 25.30 | 24.44 | <b>25.5</b> | <b>0.8</b> |
| Au(wt%)                                 | 11.34                       | 11.42 | 10.71 | 10.78 | <b>11.1</b> | <b>0.4</b> |
| atomic                                  |                             |       |       |       |             |            |
| C(at%)                                  | 89.42                       | 88.2  | 89.09 | 89.51 | <b>89.1</b> | <b>0.6</b> |
| O(at%)                                  | 0.98                        | 1.96  | 1.75  | 1.83  | <b>1.6</b>  | <b>0.4</b> |
| Cl(at%)                                 | 3.59                        | 3.66  | 3.62  | 3.35  | <b>3.6</b>  | <b>0.1</b> |
| K(at%)                                  | 0.05                        | 0.09  | 0     | 0     | <b>0.0</b>  | <b>0.0</b> |
| Ag(at%)                                 | 4.74                        | 4.74  | 4.5   | 4.28  | <b>4.6</b>  | <b>0.2</b> |
| Au(at%)                                 | 1.14                        | 1.14  | 1.04  | 1.03  | <b>1.1</b>  | <b>0.1</b> |
| Ag <sub>100-x</sub> Au <sub>x</sub> x = | 19                          | 19    | 19    | 19    | <b>19.2</b> | <b>0.3</b> |

**Table S4.** Quantitative data from EDX of CP-AgAu-GR(H<sub>2</sub>O)-10 min material

| Entry                                   | RG(H <sub>2</sub> O)-10min |       |       |             |            |
|-----------------------------------------|----------------------------|-------|-------|-------------|------------|
|                                         | test1                      | test2 | test3 | average     | SD         |
|                                         | weight                     |       |       |             |            |
| C(wt%)                                  | 72.44                      | 72.87 | 71.28 | <b>72.2</b> | <b>0.8</b> |
| O(wt%)                                  | 1.47                       | 1.95  | 1.55  | <b>1.7</b>  | <b>0.3</b> |
| Cl(wt%)                                 | 2.49                       | 3.05  | 3.30  | <b>2.9</b>  | <b>0.4</b> |
| Ag(wt%)                                 | 14.83                      | 16.53 | 17.02 | <b>16.1</b> | <b>1.1</b> |
| Au(wt%)                                 | 8.77                       | 5.60  | 6.87  | <b>7.1</b>  | <b>1.6</b> |
| atomic                                  |                            |       |       |             |            |
| C(at%)                                  | 94.6                       | 93.97 | 93.95 | <b>94.2</b> | <b>0.4</b> |
| O(at%)                                  | 1.44                       | 1.89  | 1.53  | <b>1.6</b>  | <b>0.2</b> |
| Cl(at%)                                 | 1.1                        | 1.33  | 1.47  | <b>1.3</b>  | <b>0.2</b> |
| Ag(at%)                                 | 2.16                       | 2.37  | 2.5   | <b>2.3</b>  | <b>0.2</b> |
| Au(at%)                                 | 0.7                        | 0.44  | 0.55  | <b>0.6</b>  | <b>0.1</b> |
| Ag <sub>100-x</sub> Au <sub>x</sub> x = | 24                         | 16    | 18    | <b>19.4</b> | <b>4.6</b> |

**Table S5.** Quantitative data from EDX of CP-AgAu-GR(H<sub>2</sub>O)-5min material

| Entry                            | RG(H <sub>2</sub> O)-5min |       |       |             |            |
|----------------------------------|---------------------------|-------|-------|-------------|------------|
|                                  | test1                     | test2 | test3 | average     | SD         |
|                                  | weight                    |       |       |             |            |
| C(wt%)                           | 63.89                     | 55.27 | 63.48 | <b>60.9</b> | <b>4.9</b> |
| O(wt%)                           | 1.62                      | 1.42  | 1.87  | <b>1.6</b>  | <b>0.2</b> |
| Cl(wt%)                          | 5.42                      | 6.51  | 5.32  | <b>5.8</b>  | <b>0.7</b> |
| Ag(wt%)                          | 20.57                     | 23.67 | 19.01 | <b>21.1</b> | <b>2.4</b> |
| Au(wt%)                          | 8.49                      | 13.13 | 10.31 | <b>10.6</b> | <b>2.3</b> |
| atomic                           |                           |       |       |             |            |
| C(at%)                           | 91.59                     | 89.18 | 91.43 | <b>90.7</b> | <b>1.3</b> |
| O(at%)                           | 1.75                      | 1.71  | 2.02  | <b>1.8</b>  | <b>0.2</b> |
| Cl(at%)                          | 2.63                      | 3.56  | 2.6   | <b>2.9</b>  | <b>0.5</b> |
| Ag(at%)                          | 3.28                      | 4.25  | 3.05  | <b>3.5</b>  | <b>0.6</b> |
| Au(at%)                          | 0.74                      | 1.29  | 0.91  | <b>1.0</b>  | <b>0.3</b> |
| Ag <sub>100-x</sub> Aux      x = | 18                        | 23    | 23    | <b>21.6</b> | <b>2.7</b> |

**Table S6.** Comparative performance of relevant glycerol electrooxidation reaction on metallic catalysts in alkaline media from literature.

The metal loading is normalized to the geometric area. WE: working electrode. C: carbon black Vulcan. *L*: metal loading on the electrode, per square centimeter of the electrode. Glyc.: glycerol *T*: temperature. RT: room temperature.  $E_{\text{onset}}$ : onset potential.  $j_p$ : peak current density and expressed in either amps per milligram of metal ( $\text{A mg}^{-1}$ ) or milliamps per square centimeter of the electrode ( $\text{mA cm}^{-2}$ ). ACF: activated carbon felt electrode. GDE: gas diffusion electrode. CP: carbon paper. Empty box (–) means that the original article does not provide the data.

| Ref.                                                                  | Electrode material                                       |                               |                               | Conditions             |            | Performance (50 mV s <sup>-1</sup> at scan rate) |                       |                        |
|-----------------------------------------------------------------------|----------------------------------------------------------|-------------------------------|-------------------------------|------------------------|------------|--------------------------------------------------|-----------------------|------------------------|
|                                                                       | Nanocatalyst<br>(metal loading)                          | WE<br>(area)                  | $L$<br>(μg cm <sup>-2</sup> ) | Electrolyte<br>+ Glyc. | T°<br>(°C) | $E_{\text{onset}}$<br>(V vs RHE)                 | $j_P$                 |                        |
|                                                                       |                                                          |                               |                               |                        |            |                                                  | (A mg <sup>-1</sup> ) | (mA cm <sup>-2</sup> ) |
| Herein                                                                | GDE@(0.17 wt.%): 0.25 cm <sup>2</sup>                    |                               | 16                            | 1 M KOH<br>+ 0.1 Glyc. | 25         | 0.3                                              | 18.2                  | 290                    |
|                                                                       | Au/C (20 wt.%)                                           | CP<br>(0.25 cm <sup>2</sup> ) | 16                            | 1 M KOH<br>+ 0.1 Glyc  | 25         | 0.70                                             | 2.8                   | 44                     |
| <i>Adv. Mater.</i> ,<br>2019, 31,<br>1804763. <sup>7</sup>            | Pt in N-doped<br>graphene<br>nanomesh on<br>carbon cloth | GC<br>(0.07 cm <sup>2</sup> ) | 300                           | 1 M KOH<br>+ 0.1 Glyc  | —          | 0.28                                             | 2.9                   | —                      |
| <i>Energy Environ. Sci.</i> , 2016,<br>9, 3097-<br>3102. <sup>8</sup> | Pd/C nanosponge                                          | GC<br>(0.07 cm <sup>2</sup> ) | —                             | 1 M KOH<br>+ 0.1 Glyc. | —          | 0.65                                             | —                     | 15                     |

|                                                                            |                                                          |                            |      |                       |    |      |     |      |
|----------------------------------------------------------------------------|----------------------------------------------------------|----------------------------|------|-----------------------|----|------|-----|------|
| <i>Energy Environ. Sci.</i> , 2015, 8, 2910-2915. <sup>9</sup>             | Pd nanowire networks                                     | GC (–)                     | 25.5 | 1 M KOH + 0.1 Glyc.   | –  | 0.60 | 0.6 | –    |
| <i>Appl. Catal. B: Env.</i> , 2019, 245, 604-612. <sup>10</sup>            | Pt <sub>4</sub> Au <sub>6</sub> @Ag                      | GC (0.07 cm <sup>2</sup> ) | 500  | 0.1 M KOH + 1 Glyc.   | RT | 0.50 | –   | 3.1  |
| <i>ACS Appl. Mater. Interfaces.</i> , 2019, 11, 28953-28959. <sup>11</sup> | PtAg                                                     | GC (0.07 cm <sup>2</sup> ) | –    | 0.1 M KOH + 1 M Glyc. | –  | 0.50 | –   | 7.57 |
| <i>J. Mater. Chem. A</i> , 2018, 6, 24418-24424 <sup>12</sup>              | Pt <sub>3</sub> Co <sub>1</sub> nanowires                | GC (0.07 cm <sup>2</sup> ) | –    | 1 M KOH + 1 M Glyc.   | –  | 0.4  | 3.8 | 7.2  |
| <i>Nanoscale</i> , 2017, 9, 12996-13003. <sup>13</sup>                     | Au <sub>1</sub> Ag <sub>1</sub> (core/shell nanospheres) | GC (0.07 cm <sup>2</sup> ) | 28.5 | 1 M KOH + 1 M Glyc.   | RT | 0.97 | 3.5 | –    |

|                                                                |                                                              |                            |     |                        |    |      |       |    |
|----------------------------------------------------------------|--------------------------------------------------------------|----------------------------|-----|------------------------|----|------|-------|----|
| <i>J. Am. Chem. Soc.</i> , 2014, 136, 3937-3945. <sup>14</sup> | Pd sel-supported                                             | GC (0.25 cm <sup>2</sup> ) | 200 | 1 M KOH + 0.1 Glyc.    | –  | 0.6  | 0.1   | –  |
| <i>RSC Adv.</i> , 2014, 4, 64476-64483. <sup>15</sup>          | Pd/C (40 wt.%)                                               | GC (0.07 cm <sup>2</sup> ) | 320 | 0.1 M KOH + 0.1 Glyc.  | –  | 0.65 | 0.025 | –  |
| <i>ACS Catal.</i> , 2013, 3, 2403-2411. <sup>3</sup>           | Pd/C (30 wt.%)                                               | GC (0.07 cm <sup>2</sup> ) | 116 | 0.1 M NaOH + 0.1 Glyc. | RT | 0.50 | 0.16  | –  |
| <i>Appl. Catal. B: Env.</i> , 2010, 93, 354-362. <sup>16</sup> | Pd/C (40 wt.%)                                               | GC (0.07 cm <sup>2</sup> ) | 142 | 1 M KOH + 0.1 Glyc.    | 20 | 0.6  | –     | 25 |
| <i>ChemElectroChem</i> , 2016, 3, 1694-1704. <sup>17</sup>     | Pt <sub>3</sub> Pd <sub>6</sub> Bi <sub>1</sub> /C (40 wt.%) | GC (0.07 cm <sup>2</sup> ) | 100 | 1 M NaOH + 0.1 Glyc.   | RT | 0.4  | –     | 40 |
| <i>ChemElectroChem</i> , 2017, 4, 39-45. <sup>18</sup>         | Pt <sub>86</sub> Ru <sub>14</sub> /C (40 wt.%)               | GC (0.07 cm <sup>2</sup> ) | 320 | 1 M NaOH + 1 Glyc.     | RT | 0.5  | 0.6   | –  |

|                                                                |                                     |                            |     |                       |    |      |      |    |
|----------------------------------------------------------------|-------------------------------------|----------------------------|-----|-----------------------|----|------|------|----|
| <i>Electrochem. Commun.</i> , 2013, 34, 185-188. <sup>19</sup> | Pd                                  | GC (0.07 cm <sup>2</sup> ) | 200 | 1 M NaOH + 0.1 Glyc.  | RT | 0.63 | 0.4  | –  |
| <i>Chem. Commun.</i> , 2017, 53, 1642-1645. <sup>20</sup>      | Pd nanosheets                       | GC (0.07 cm <sup>2</sup> ) | 137 | 1 M NaOH + 0.1 Glyc.  | RT | 0.50 | 0.55 | 70 |
| <i>ChemElectroChem</i> , 2018, 5, 743-747. <sup>21</sup>       | ACF@Pd (1 wt.%): ~1 cm <sup>2</sup> |                            | 96  | 0.1 M KOH + 0.1 Glyc. | RT | <0.5 | 0.44 | 40 |

**Table S7.** Fitted EIS data from the used equivalent electrical circuit ( $R_{\Omega}+Q_{CPE}/R_{ct}$ ).

The electrode surface is 0.25 cm<sup>2</sup>. Electrode = “CP-AgAu-GR(NaCl)-5min”

| E <sub>appl</sub> (V vs RHE) | ohmic resistance R <sub>Ω</sub> (Ω) | charge transfer resistance R <sub>ct</sub> (Ω) | constant phase element                    |      |
|------------------------------|-------------------------------------|------------------------------------------------|-------------------------------------------|------|
|                              |                                     |                                                | Q <sub>CPE</sub> (μF s <sup>(a-1)</sup> ) | a    |
| 0.75                         | 3.3                                 | 189.8                                          | 395                                       | 0.88 |
| 0.80                         | 3.3                                 | 145.5                                          | 350                                       | 0.89 |
| 0.85                         | 3.3                                 | 74.2                                           | 305                                       | 0.91 |
| 0.90                         | 3.3                                 | 31.3                                           | 293                                       | 0.92 |
| 0.94                         | 3.3                                 | 16.0                                           | 299                                       | 0.92 |
| 1.00                         | 3.3                                 | 8.2                                            | 290                                       | 0.93 |

**Table S8.** Fitted EIS data from the used equivalent electrical circuit ( $R_{\Omega}+Q_{CPE}/R_{ct}$ ).

The electrode surface is 0.25 cm<sup>2</sup>. Electrode = “CP-Au”. Working electrode area = 0.25 cm<sup>2</sup>

| E <sub>appl</sub> (V vs RHE) | ohmic resistance R <sub>Ω</sub> (Ω) | charge transfer resistance R <sub>ct</sub> (Ω) | constant phase element                    |      |
|------------------------------|-------------------------------------|------------------------------------------------|-------------------------------------------|------|
|                              |                                     |                                                | Q <sub>CPE</sub> (μF s <sup>(a-1)</sup> ) | a    |
| 0.75                         | 3.4                                 | 240.7                                          | 93.0                                      | 0.93 |
| 0.80                         | 3.4                                 | 161.2                                          | 89.4                                      | 0.93 |
| 0.85                         | 3.4                                 | 107.1                                          | 87.6                                      | 0.93 |
| 0.94                         | 3.4                                 | 15.5                                           | 100.0                                     | 0.91 |
| 1.00                         | 3.4                                 | 7.5                                            | 133.0                                     | 0.87 |

**Table S9.** Fitted EIS data from the used equivalent electrical circuit ( $R_{\Omega}+Q_{CPE}/R_{ct}$ ).

The electrode surface is  $0.5 \text{ cm}^2$ . Electrode = “Vulcan-Au”

| $E_{\text{appl}}(\text{V vs RHE})$ | ohmic resistance $R_{\Omega}(\Omega)$ | charge transfer resistance<br>$R_{ct}(\Omega)$ | constant phase element           |      |
|------------------------------------|---------------------------------------|------------------------------------------------|----------------------------------|------|
|                                    |                                       |                                                | $Q_{CPE}(\mu\text{F s}^{(a-1)})$ | a    |
| 0.75                               | 3.8                                   | 149.5                                          | 484.5                            | 0.91 |
| 0.80                               | 3.9                                   | 78.8                                           | 480.5                            | 0.90 |
| 0.85                               | 3.9                                   | 36.8                                           | 516.9                            | 0.89 |
| 0.90                               | 3.8                                   | 17.9                                           | 570.0                            | 0.87 |
| 0.94                               | 3.8                                   | 10.9                                           | 694.2                            | 0.84 |
| 1.00                               | 3.8                                   | 9.9                                            | 1002.0                           | 0.80 |

**Table S10.** Electrochemical kinetics data from the electrodes surface probing using the redox couple  $\text{Fe}(\text{CN})_6^{3-}/\text{Fe}(\text{CN})_6^{4-}$ .

The modeling curve of Figure S19 is used. iR-free CVs were recorded at  $100 \text{ mV s}^{-1}$  in  $0.5 \text{ M KNO}_3 + 1 \text{ mM K}_3[\text{Fe}(\text{CN})_6]$  at  $25 \text{ }^\circ\text{C}$ . Error bars represent 1 SD ( $n = 3$ ). For CP-AgAu, the galvanic replacement (GR) was performed in a brine solution.

| Entry   | $\Delta E_p(\text{mV})$ | $k^\circ(10^{-3} \text{ cm s}^{-1})$ | $R_{ct}(\Omega \text{ cm}^2)$ | $j_0(10^{-3} \text{ A cm}^{-2})$ |
|---------|-------------------------|--------------------------------------|-------------------------------|----------------------------------|
| CP      | $458.2 \pm 2.1$         | $0.26 \pm 0.01$                      | $1006.6 \pm 6.2$              | $25.5 \pm 0.2$                   |
| CP-Ag   | $241.6 \pm 1.9$         | $0.69 \pm 0.01$                      | $383.9 \pm 5.1$               | $66.9 \pm 0.9$                   |
| CP-AgAu | $139.7 \pm 6.6$         | $1.98 \pm 0.20$                      | $135.4 \pm 14.3$              | $191.1 \pm 19.4$                 |
| Pt bulk | $76.5 \pm 2.1$          | $12.61 \pm 1.84$                     | $21.4 \pm 2.9$                | $1216.5 \pm 177.2$               |



**Table S11.** Fitted EIS data from the used equivalent electrical circuit “ $R_{\Omega}+Q_{CPE} //(R_{ct}+W)$ ”.

Experiments were performed 0.5 M  $KNO_3$  + 1 mM  $K_3[Fe(CN)_6]$  at 25 °C at  $E_{appl}(=OCP) = 0.25 \pm 0.01$  V vs SCE. For CP-AgAu, the galvanic replacement (GR) was performed in a brine solution.

| Entry   | $R_w(\Omega \text{ cm}^2)$ | $R_{ct}(\Omega \text{ cm}^2)$ | $Q_{CPE}(\mu F \text{ cm}^2 \text{ s}^{(a-1)})$ | a    | $W(\Omega \text{ cm}^2 \text{ s}^{-1/2})$ |
|---------|----------------------------|-------------------------------|-------------------------------------------------|------|-------------------------------------------|
| CP      | 3.1                        | 1843.8                        | 1.1                                             | 0.90 | 1103.8                                    |
| CP-Ag   | 2.9                        | 626.8                         | 2.0                                             | 0.90 | 525.0                                     |
| CP-AgAu | 2.9                        | 170.5                         | 4.3                                             | 0.87 | 279.3                                     |
| Pt bulk | 4.3                        | 38.4                          | 7.2                                             | 0.90 | 508.8                                     |

**Table S12.** Quantitative data from EDX of CP-AgAu-GR( $H_2O$ )-washed(NaCl)-5min material

| Entry               | GR( $H_2O$ )-washed(NaCl)-5min |       |       |              |             |
|---------------------|--------------------------------|-------|-------|--------------|-------------|
|                     | test1                          | test2 | test3 | average      | SD          |
|                     | weight                         |       |       |              |             |
| C(wt%)              | 87.17                          | 80.12 | 86.62 | <b>84.6</b>  | <b>3.9</b>  |
| O(wt%)              | 2.50                           | 2.04  | 2.29  | <b>2.3</b>   | <b>0.2</b>  |
| Cl(wt%)             | 0.06                           | 0.22  | 0.09  | <b>0.1</b>   | <b>0.1</b>  |
| Ag(wt%)             | 0.44                           | 0.79  | 0.41  | <b>0.5</b>   | <b>0.2</b>  |
| Au(wt%)             | 9.83                           | 16.83 | 10.59 | <b>12.4</b>  | <b>3.8</b>  |
| atomic              |                                |       |       |              |             |
| C(at%)              | 97.16                          | 96.72 | 97.23 | <b>97.04</b> | <b>0.28</b> |
| O(at%)              | 2.09                           | 1.85  | 1.93  | <b>1.96</b>  | <b>0.12</b> |
| Cl(at%)             | 0.02                           | 0.09  | 0.04  | <b>0.05</b>  | <b>0.04</b> |
| Ag(at%)             | 0.05                           | 0.11  | 0.05  | <b>0.07</b>  | <b>0.03</b> |
| Au(at%)             | 0.67                           | 1.24  | 0.75  | <b>0.89</b>  | <b>0.31</b> |
| $Ag_{100-x}Aux$ x = | 93                             | 92    | 94    | <b>93</b>    | <b>1</b>    |

**Table S13.** Quantitative data from EDX of CP-AgAu-GR(NaCl)-5min material

| Entry                          | RG(NaCl)-5min |       |       |       |              |             |
|--------------------------------|---------------|-------|-------|-------|--------------|-------------|
|                                | test1         | test2 | test3 | test4 | average      | SD          |
|                                | weight        |       |       |       |              |             |
| Cl(wt%)                        | 0             | 0     | 0     | 0     | <b>0</b>     | -           |
| Ag(wt%)                        | 7.04          | 7.20  | 7.45  | 7.97  | <b>7.42</b>  | <b>0.41</b> |
| Au(wt%)                        | 92.96         | 92.80 | 92.55 | 92.03 | <b>92.59</b> | <b>0.41</b> |
| atomic                         |               |       |       |       |              |             |
| Cl(at%)                        | 0             | 0     | 0     | 0     | <b>0</b>     | -           |
| Ag(at%)                        | 12.15         | 12.40 | 12.81 | 13.65 | <b>12.75</b> | <b>0.66</b> |
| Au(at%)                        | 87.85         | 87.60 | 87.19 | 86.35 | <b>87.25</b> | <b>0.66</b> |
| Ag <sub>100-x</sub> Aux    x = | 88            | 88    | 87    | 86    | <b>87</b>    | <b>1</b>    |

**Table S14.** Quantitative data from the electrolysis and HPLC of GDE@AgAu material.

| Retention time (min) | HPLC           |                              |                     |                 |
|----------------------|----------------|------------------------------|---------------------|-----------------|
|                      | Name           | stoichiometric coefficient v | Concentration C(mM) | Selectivity (%) |
| 11.45                | Oxalic acid    | 1.5                          | 2.2                 | 1.8             |
| 11.65                | Mesoxalic acid | 1.0                          | 0.0                 | 0.0             |
| 12.76                | Tartronic acid | 1.0                          | 0.2                 | 0.1             |
| 17.66                | Glyceric acid  | 1.0                          | 1.3                 | 0.7             |
| 20.02                | Glycolic acid  | 1.5                          | 40.0                | 31.9            |
| 22.31                | formic acid    | 3.0                          | 41.0                | 65.5            |

$$v = \frac{\text{number of carbon atoms in the glycerol}}{\text{number of carbon atoms in the product}}$$

$$\text{Selectivity} = 100 \times \frac{v_i C_i}{\sum_{i=1}^3 v_i C_i}$$

where  $i$  is the compound.

**Table S15.** Post-mortem quantitative data from EDX of CP-AgAu-GR(NaCl)-5min material after 3 h of bulk electrolysis.

$E_{\text{applied}} = 0.3 \text{ V}$  vs MOE = 1.246 V vs RHE with no iR-drop correction. Temperature = 25 °C.

| Entry                          | RG(NaCl)-5min_Electrolysis_3h |       |       |       |       |       |              |             |
|--------------------------------|-------------------------------|-------|-------|-------|-------|-------|--------------|-------------|
|                                | test1                         | test2 | test3 | test4 | test5 | test6 | average      | SD          |
|                                | weight                        |       |       |       |       |       |              |             |
| Ag(wt%)                        | 11.26                         | 11.04 | 9.65  | 10.49 | 12.07 | 10.60 | <b>10.85</b> | <b>0.82</b> |
| Au(wt%)                        | 88.74                         | 88.96 | 90.35 | 89.51 | 87.93 | 89.40 | <b>89.15</b> | <b>0.82</b> |
| atomic                         |                               |       |       |       |       |       |              |             |
| Ag(at%)                        | 18.81                         | 18.48 | 16.32 | 17.63 | 20.04 | 17.80 | <b>18.18</b> | <b>1.25</b> |
| Au(at%)                        | 81.19                         | 81.52 | 83.68 | 82.37 | 79.96 | 82.20 | <b>81.82</b> | <b>1.25</b> |
| Ag <sub>100-x</sub> Aux    x = | 81                            | 82    | 84    | 82    | 80    | 82    | <b>82</b>    | <b>1</b>    |

## SUPPLEMENTARY FIGURES

Method for Ag Nanostructured Particles Growth at GDE.

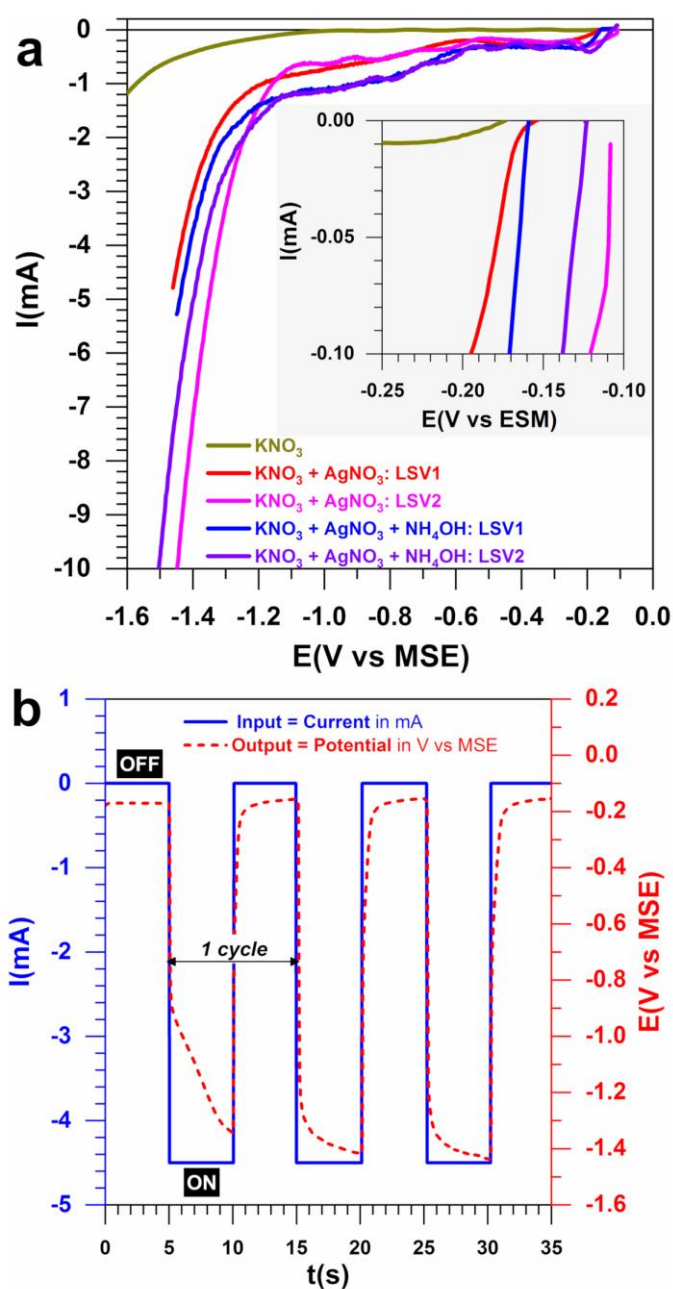

**Fig. S1.** The developed method for the direct growth of Ag NPs onto the surface of GDE.

(a) Control LSV curves obtained at  $5 \text{ mV s}^{-1}$  in MQ water in the presence of different chemical species: 200 mM  $\text{KNO}_3$ , 0.15 mM  $\text{AgNO}_3$ , and 0.60 mM  $\text{NH}_4\text{OH}$  ( $R = 4$ ). (b) Program of the pulse electrodeposition at a GDE: The applied current (input, left y-axis) and the response of the potential (output, right y-axis) as a function of time during the first cycles. The temperature is  $25^\circ\text{C}$ .

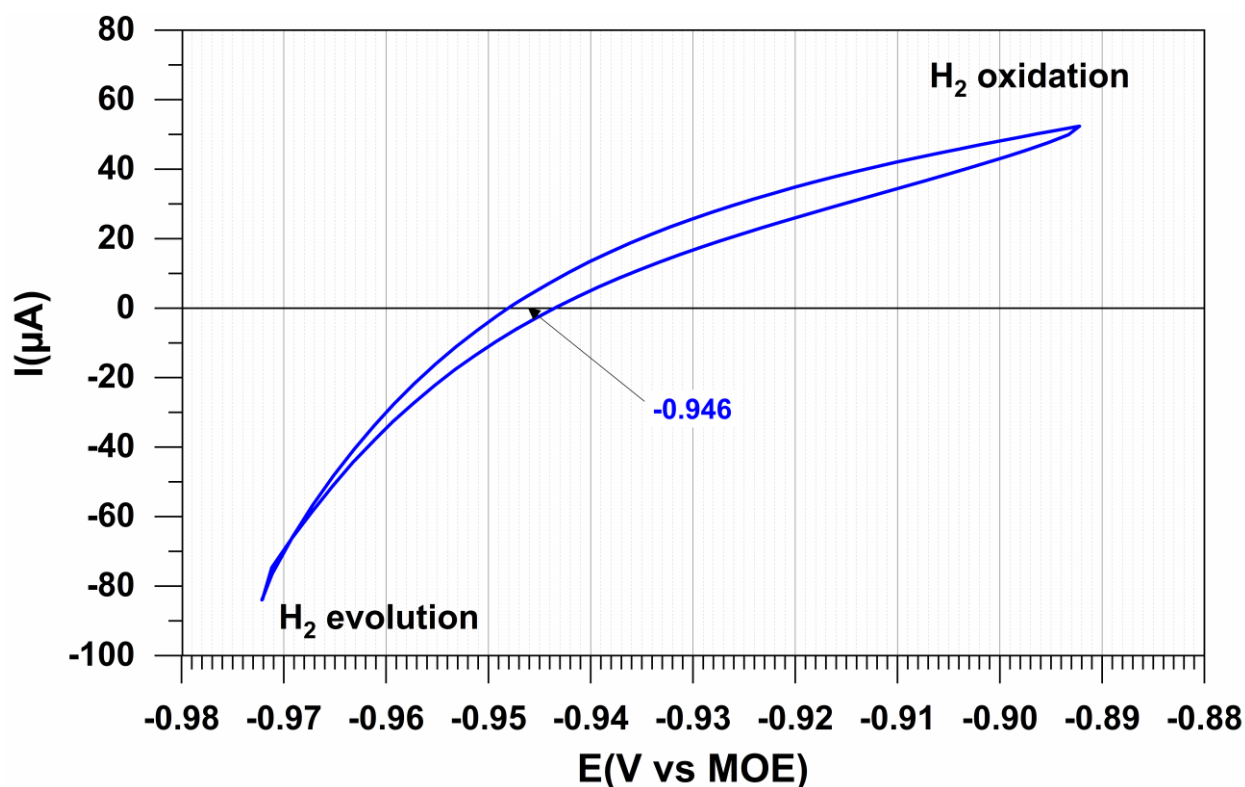

**Fig. S2.** CV for the calibration of the reference electrode.

Steady-state CV recorded in  $\text{H}_2$ -saturated 1 M KOH at  $1 \text{ mV s}^{-1}$  at  $25^\circ\text{C}$  by employing a Pt plate as the working electrode, a Pt mesh as the counter electrode and a  $\text{Hg}|\text{HgO}|\text{KOH } 1 \text{ M}$  as the reference electrode, referred to as MOE. Note: NB: experiments were performed in a quiescent solution.

Results: The average of the two potentials at which the current crossed zero is taken to be the thermodynamic potential for the hydrogen electrode reactions. Thus, the scaling relationship is as following:

$$E(\text{V vs RHE}) = E(\text{V vs MOE}) + 0.946$$

## Characterization of the used GDE

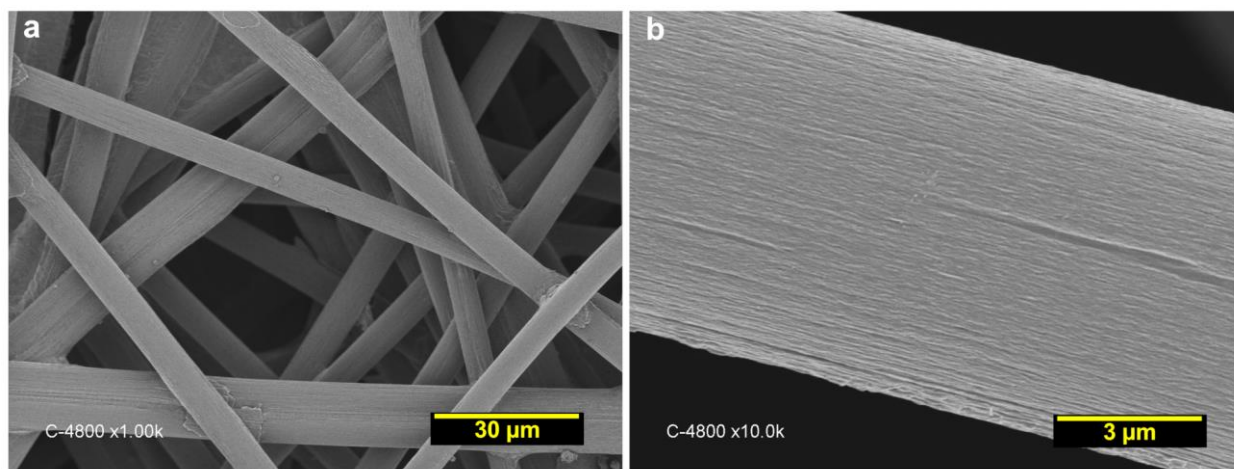

**Fig. S3.** SEM/HRSEM pictures of the used GDE-based carbon paper (AvCarb MGL190, 190  $\mu\text{m}$  thickness).

(a) SEM image and (b) HRSEM micrograph.

The white color results from the deposition of a thin layer (1-5 nm) of Pt to enhance the imaging capability. The SEM images show different fibers (filled tubes) with a diameter of 7-9  $\mu\text{m}$ . Since the thickness is 190  $\mu\text{m}$ , it can be deduced that the entire 3D network is composed of ca. 27-21 layers of microfibers.

Optimization for Metal Particles Growth on the Surface of GDE.

*Effect of  $\text{Ag}^+$  Complexation by  $\text{NH}_3$  on the Ag Particles Growth onto GDE*

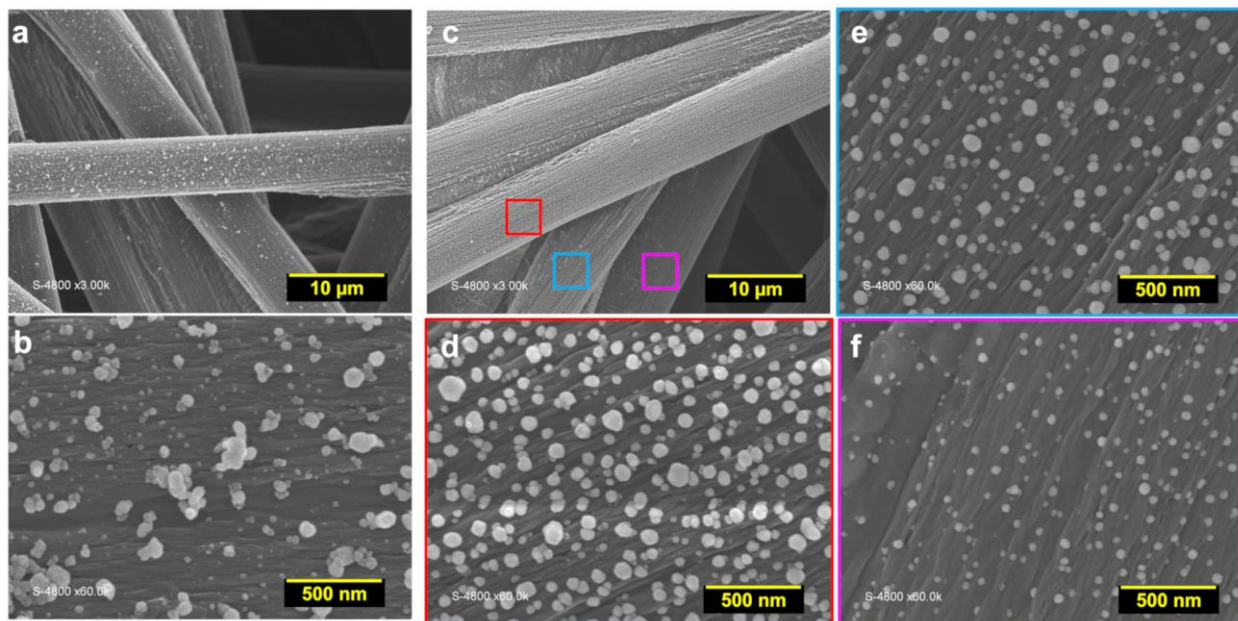

**Fig. S4.** SEM micrographs of Ag grown onto a GDE for different ratios  $R = n(\text{NH}_4\text{OH})/n(\text{AgNO}_3)$ .

Conditions of 200 mM  $\text{KNO}_3$ , 0.15 mM  $\text{AgNO}_3$ , 0.60 mM  $\text{NH}_4\text{OH}$ ,  $j_{\text{appl}} = -0.5 \text{ mA cm}^{-2}$ ;  $t_{\text{OFF}} = t_{\text{ON}} = 5 \text{ s}$ ;  $N_{\text{cycles}} = 126$  and temperature = 25 °C. (a, b)  $R = 0$ ; (c-f)  $R = 4$ .

Results: Upon the introduction of ammonia in the reactor containing aqueous solution of  $\text{AgNO}_3$ , the chemical equilibrium and electrochemical reduction reactions are described below. The strong decrease of the standard redox potential of  $\text{Ag(I)}$  from 0.80 to 0.37 V vs SHE enables lowering the reduction kinetics, which leads to a tight control of the seed growth into homogeneous particles (Figure S4b versus Figure S4d).

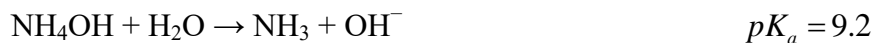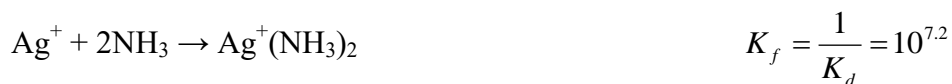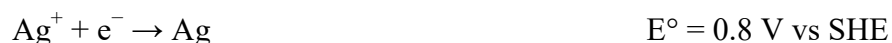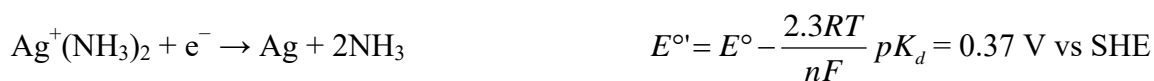



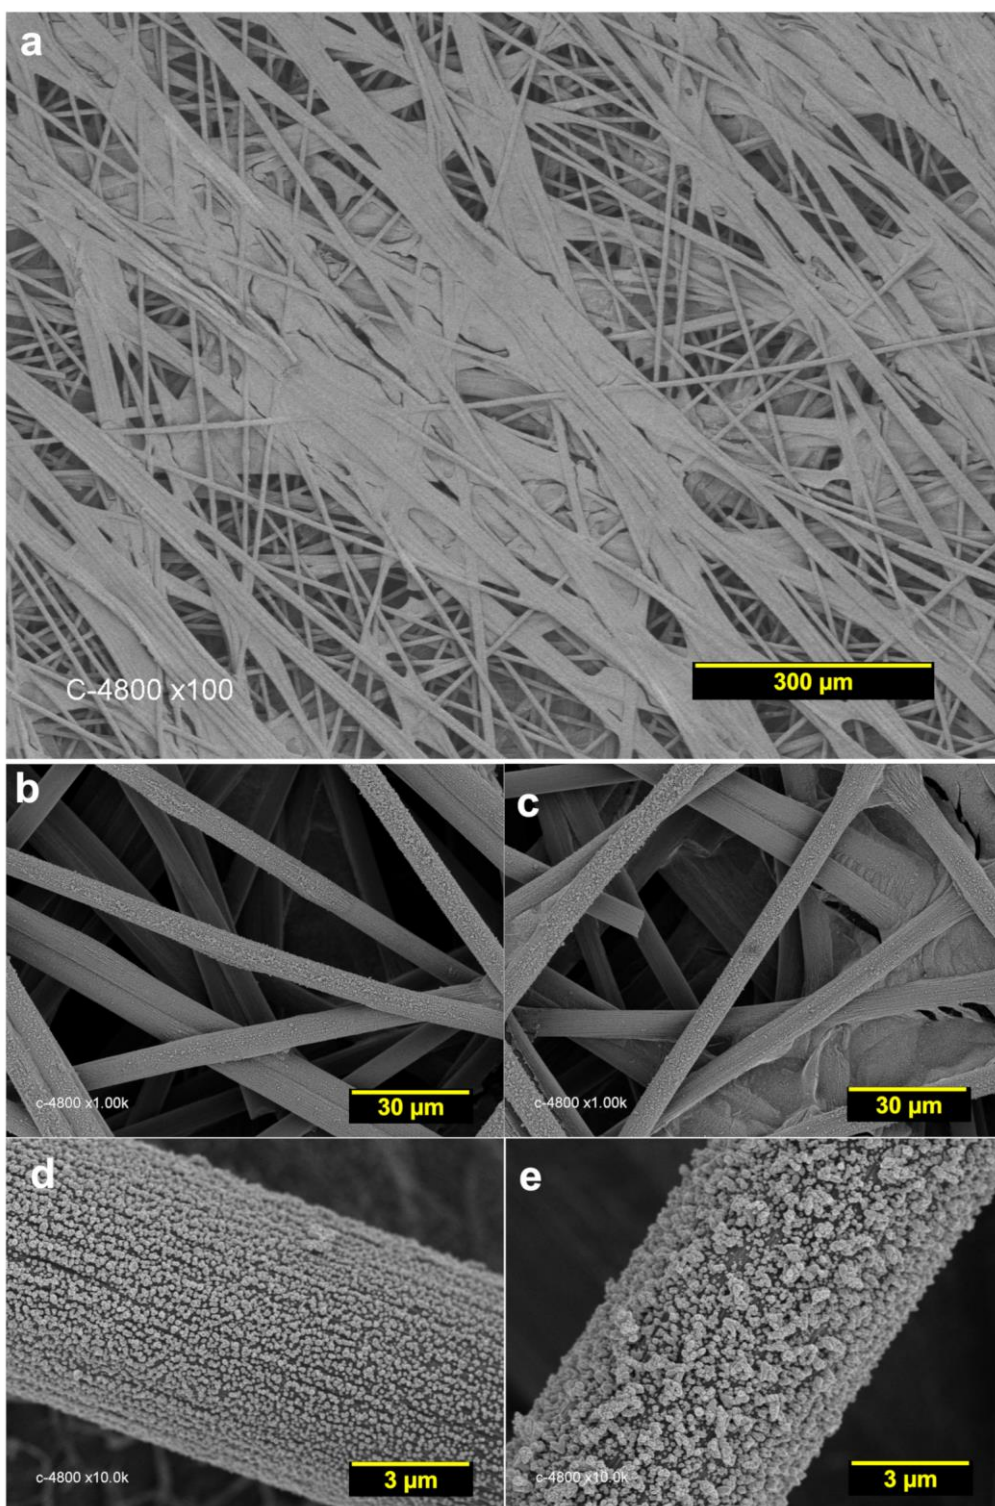

**Fig. S5.** Overview SEM micrographs of Ag grown onto a GDE for the ratio  $R = n(\text{NH}_4\text{OH})/n(\text{AgNO}_3) = 4$

(a-e) Images at different magnifications. Synthesis conditions: 200 mM  $\text{KNO}_3$ , 0.30 mM  $\text{AgNO}_3$ , 1.20 mM  $\text{NH}_4\text{OH}$ ,  $j_{\text{appl}} = -0.5 \text{ mA cm}^{-2}$ ;  $t_{\text{OFF}} = t_{\text{ON}} = 5 \text{ s}$ ;  $N_{\text{cycles}} = 252$  and temperature = 25 °C.



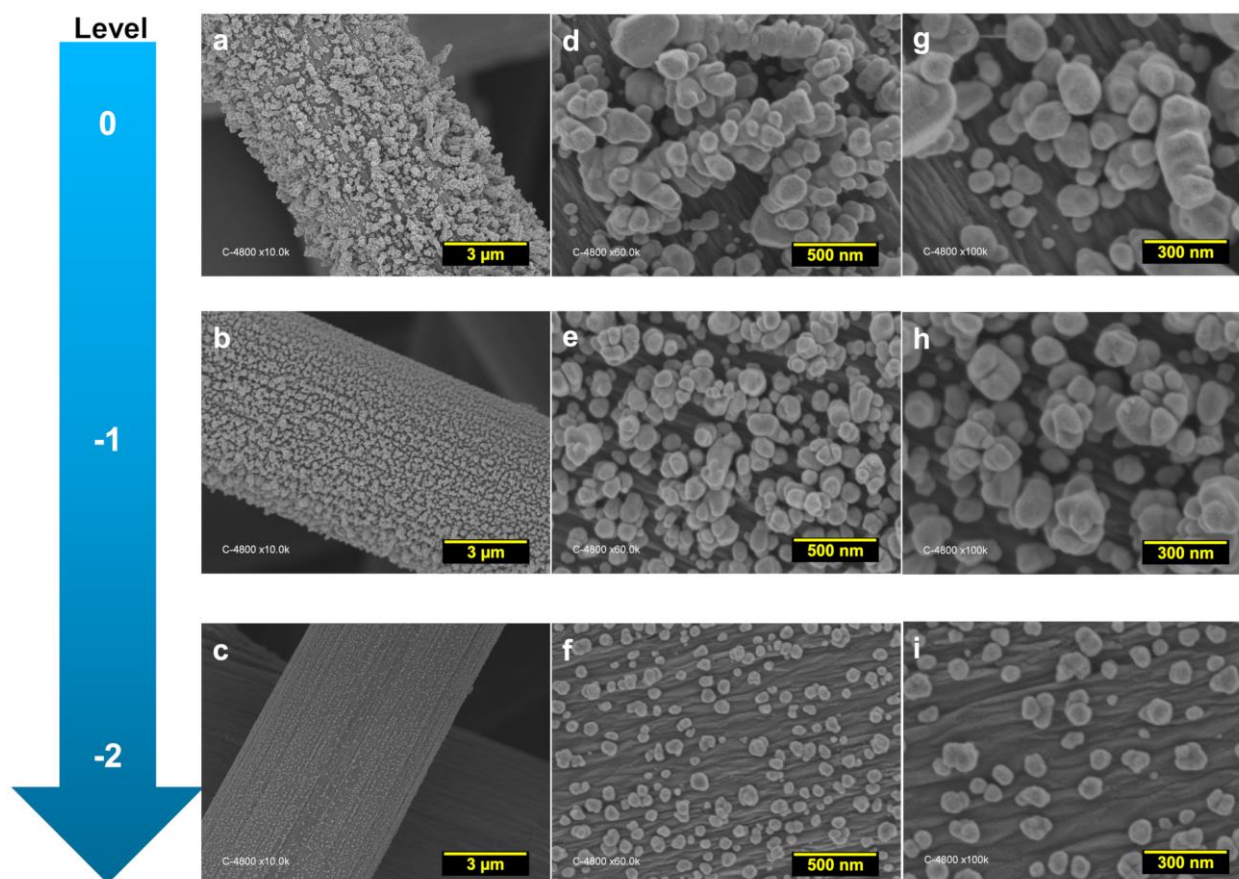

**Fig. S6.** SEM/HRSEM micrographs of Ag grown onto a GDE for the ratio  $R = n(\text{NH}_4\text{OH})/n(\text{AgNO}_3) = 4$  to illustrate the deposition within the 3D structure of GDE.

(a-i) Images at different magnifications. Synthesis conditions: 200 mM  $\text{KNO}_3$ , 0.30 mM  $\text{AgNO}_3$ , 1.20 mM  $\text{NH}_4\text{OH}$ ,  $j_{\text{appl}} = -0.5 \text{ mA cm}^{-2}$ ;  $t_{\text{OFF}} = t_{\text{ON}} = 5 \text{ s}$ ;  $N_{\text{cycles}} = 252$  and temperature = 25 °C. The arrow indicates the level of the fiber starting from: (a, d, g) first or surface (top), (b, e, h) second and (c, f, i) third.

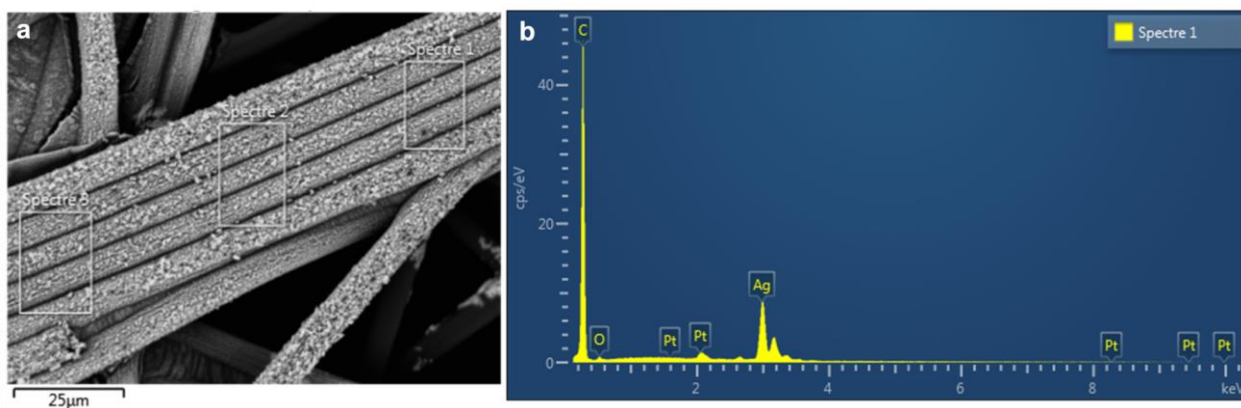

**Fig. S7.** EDX analysis of Ag grown onto a GDE for the ratio  $R = n(\text{NH}_4\text{OH})/n(\text{AgNO}_3) = 4$   
 (a) Overview SEM micrograph and (b) EDX profile. Synthesis conditions: 200 mM  $\text{KNO}_3$ , 0.30 mM  $\text{AgNO}_3$ , 1.20 mM  $\text{NH}_4\text{OH}$ ,  $j_{\text{appl}} = -0.5 \text{ mA cm}^{-2}$ ;  $t_{\text{OFF}} = t_{\text{ON}} = 5 \text{ s}$ ;  $N_{\text{cycles}} = 252$  and temperature = 25 °C. Please: Read “Spectre” as “Spectra”. NB: the signal of Pt comes from the sample preparation to enhance the SEM imaging capability.

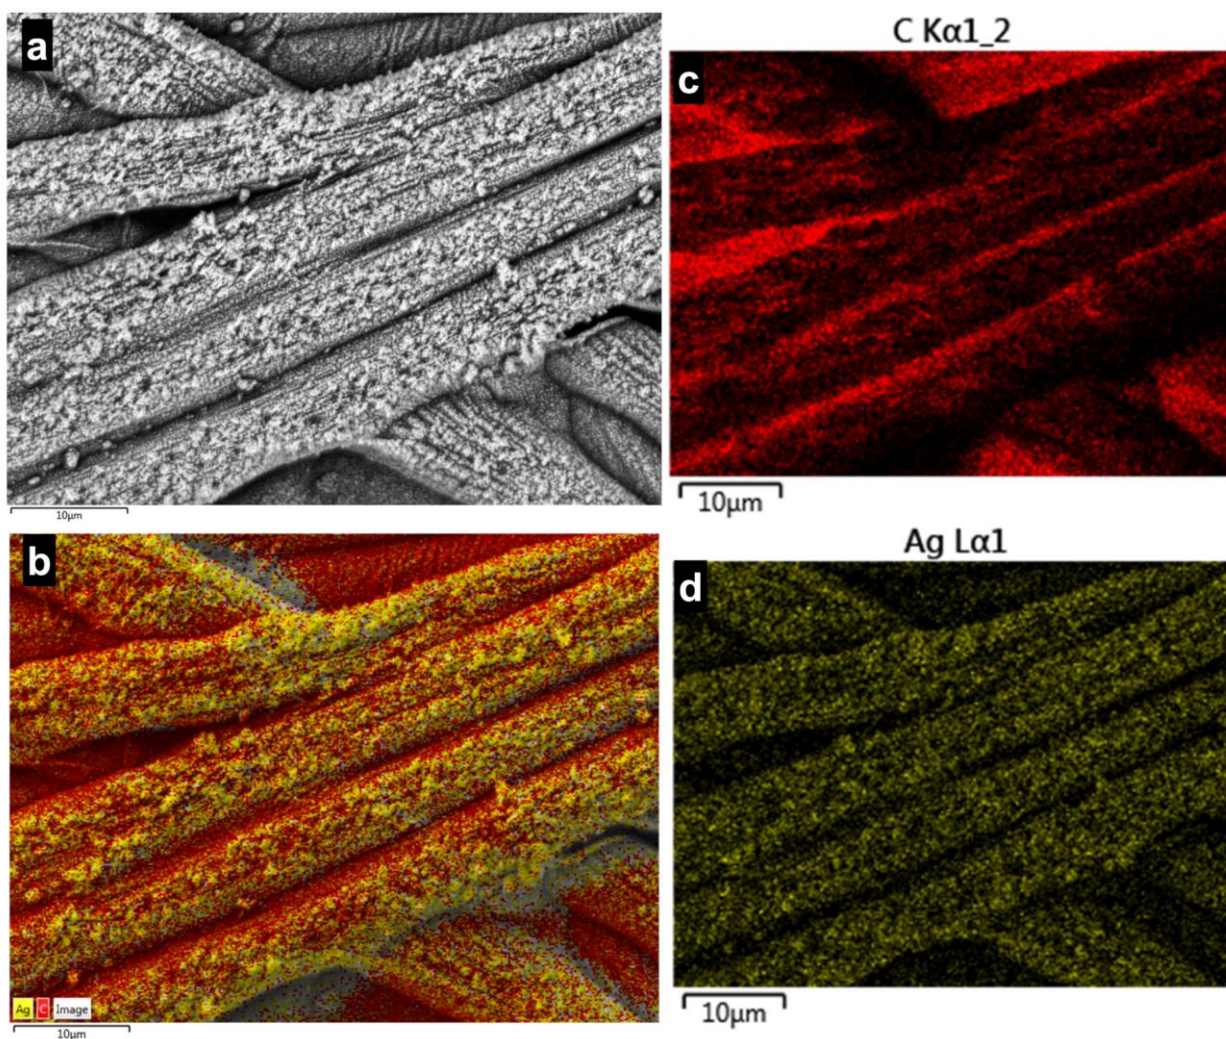

**Fig. S8.** EDX mapping of Ag grown onto a GDE for the ratio  $R = n(\text{NH}_4\text{OH})/n(\text{AgNO}_3) = 4$  (a) SEM micrograph (during EDX) and the corresponding EDX elemental distribution maps of: (b) C+Ag, (c) C and (d) Ag. Synthesis conditions: 200 mM  $\text{KNO}_3$ , 0.30 mM  $\text{AgNO}_3$ , 1.20 mM  $\text{NH}_4\text{OH}$ ,  $j_{\text{appl}} = -0.5 \text{ mA cm}^{-2}$ ;  $t_{\text{OFF}} = t_{\text{ON}} = 5 \text{ s}$ ;  $N_{\text{cycles}} = 252$  and temperature = 25 °C

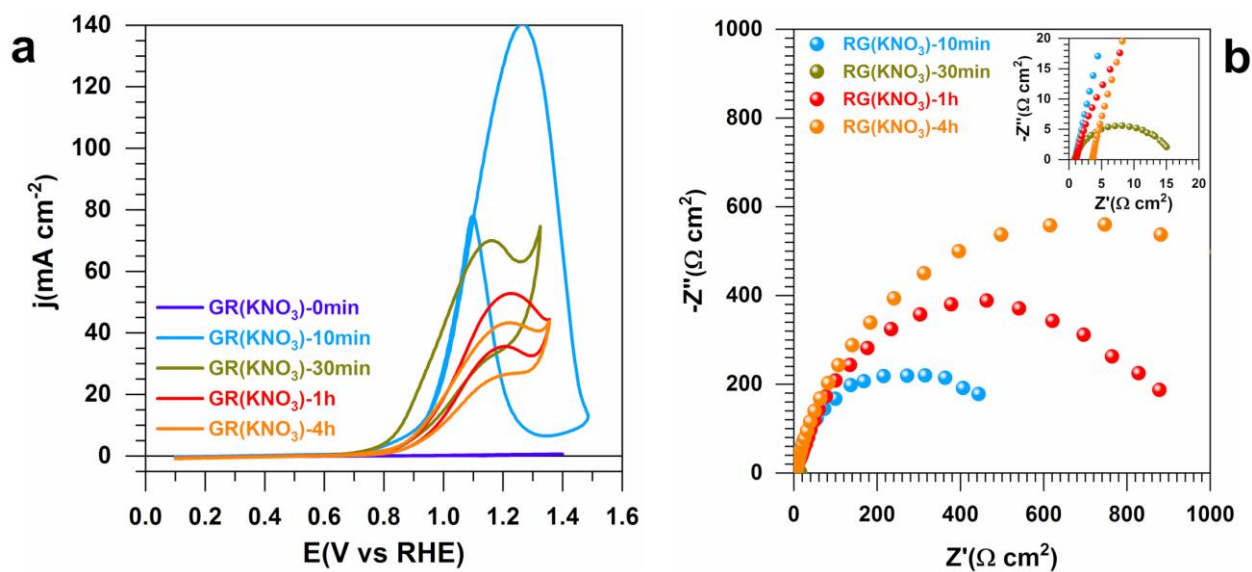

**Fig. S9.** Performance and characterization of the as-synthesized GDE@AgAu materials by the galvanic replacement (GR) performed in  $\text{KNO}_3$ .

(a) iR-free CVs recorded at  $50 \text{ mV s}^{-1}$  in  $1 \text{ M KOH}$  at  $25^\circ \text{C}$  in presence of  $0.1 \text{ M}$  glycerol.

(b) Complex-plane Nyquist impedance plots recorded at  $0.9 \text{ V}$  vs RHE in  $1 \text{ M KOH} + 0.1$  glycerol at a temperature of  $25^\circ \text{C}$ .



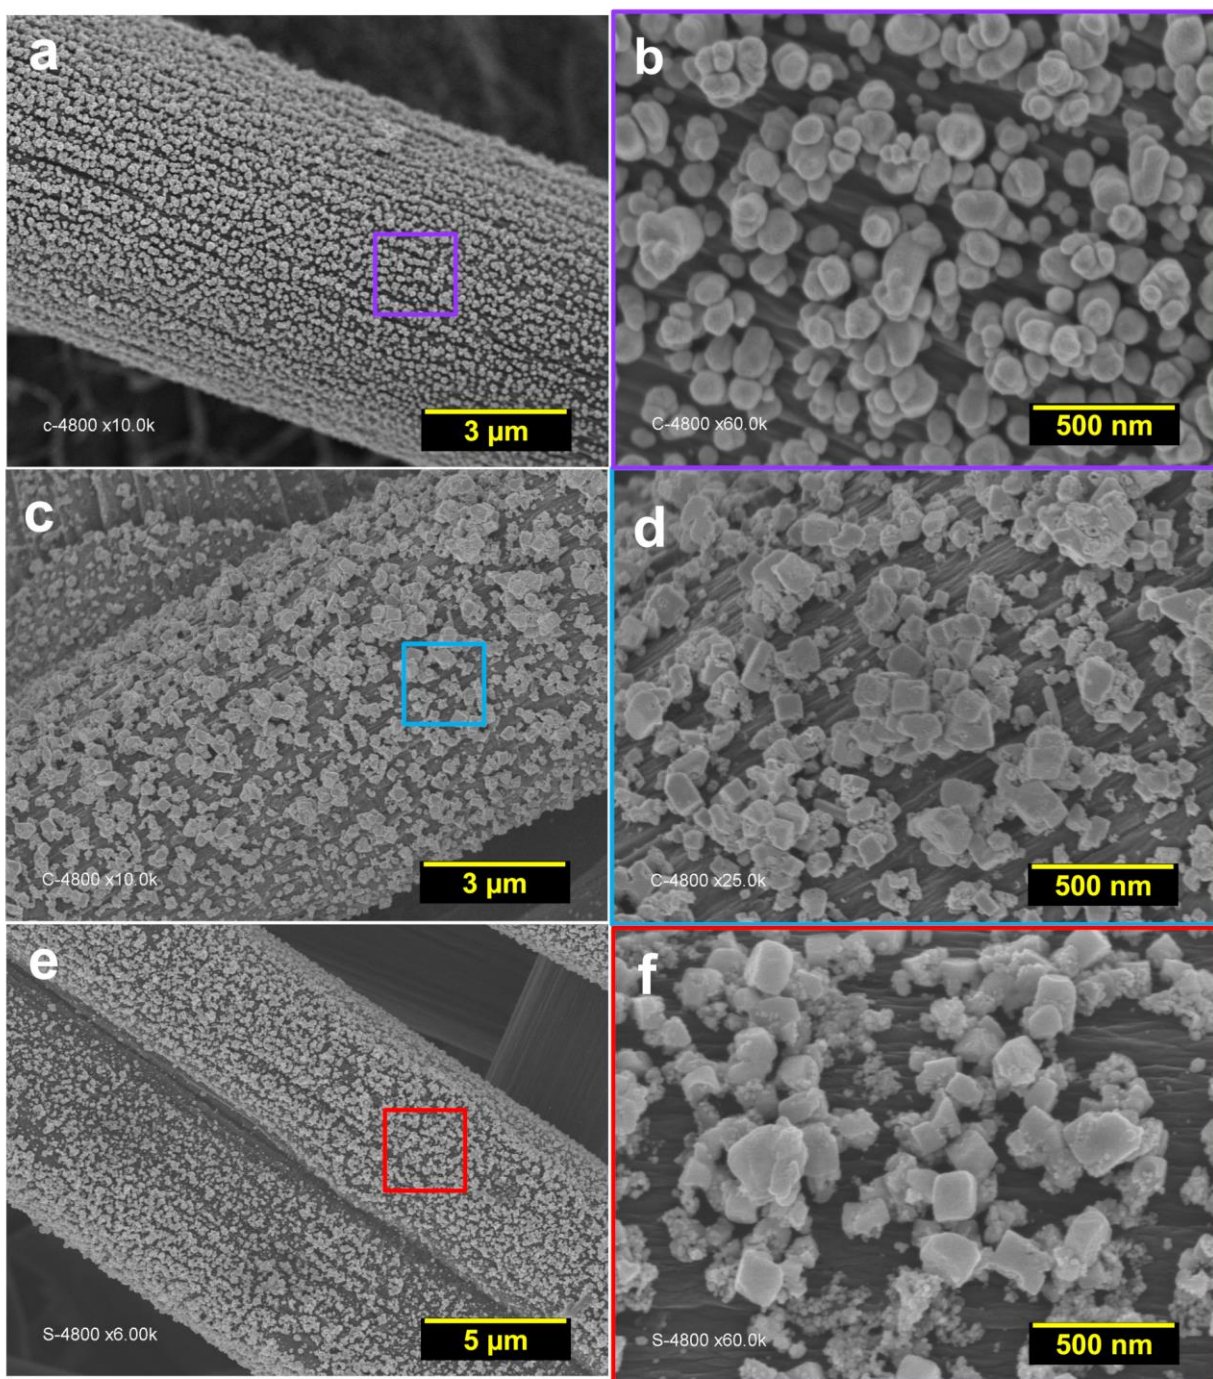

**Fig. S10.** Characterization of the as-synthesized GDE@AgAu materials for the galvanic replacement (GR) performed in  $\text{KNO}_3$ .

SEM/HRSEM micrographs for the reaction time: (a, b) 0, (c, d) 30 min, (e, f) 4 h.

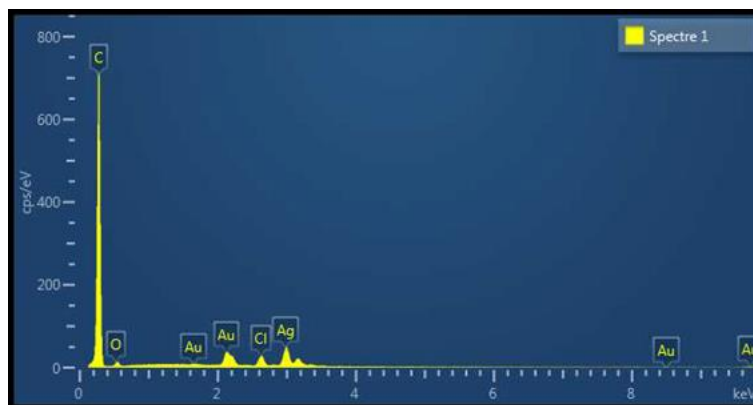

**Fig. S11.** EDX spectrum of the as-synthesized CP-AgAu-GR(KNO<sub>3</sub>)-10min material.

Pulse electrodeposition conditions:  $R = n(\text{NH}_4\text{OH})/n(\text{AgNO}_3) = 4$ , 200 mM KNO<sub>3</sub>, 0.30 mM AgNO<sub>3</sub>,  $j_{\text{appl}} = -0.5 \text{ mA cm}^{-2}$ ;  $t_{\text{OFF}} = t_{\text{ON}} = 5 \text{ s}$ ;  $N_{\text{cycles}} = 252$  and temperature = 25 °C. Galvanic replacement (GR) conditions: 200 mM KNO<sub>3</sub>, 487 μM HAuCl<sub>4</sub>,  $t_{\text{GR}} = 10 \text{ min}$ , temperature = RT, gentle shaking. Please: Read “Spectre” as “Spectrum”.

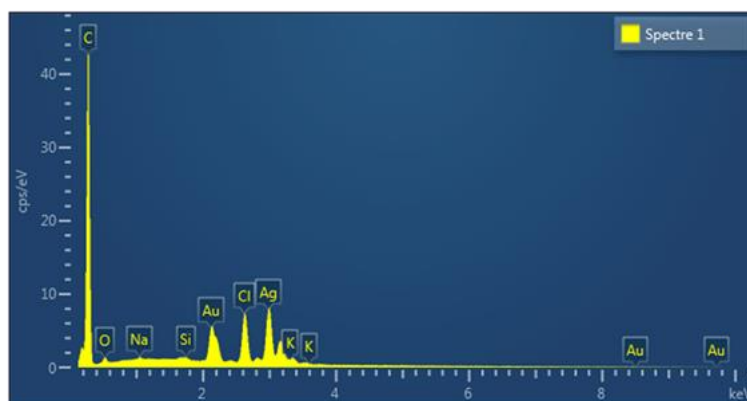

**Fig. S12.** EDX spectrum of the as-synthesized CP-AgAu-GR(KNO<sub>3</sub>)-30min material.

Pulse electrodeposition conditions:  $R = n(\text{NH}_4\text{OH})/n(\text{AgNO}_3) = 4$ , 200 mM KNO<sub>3</sub>, 0.30 mM AgNO<sub>3</sub>,  $j_{\text{appl}} = -0.5 \text{ mA cm}^{-2}$ ;  $t_{\text{OFF}} = t_{\text{ON}} = 5 \text{ s}$ ;  $N_{\text{cycles}} = 252$  and temperature = 25 °C. Galvanic replacement (GR) conditions: 200 mM KNO<sub>3</sub>, 487  $\mu\text{M}$  HAuCl<sub>4</sub>,  $t_{\text{GR}} = 30 \text{ min}$ , temperature = RT, gentle shaking. Please: Read “Spectre” as “Spectrum”.

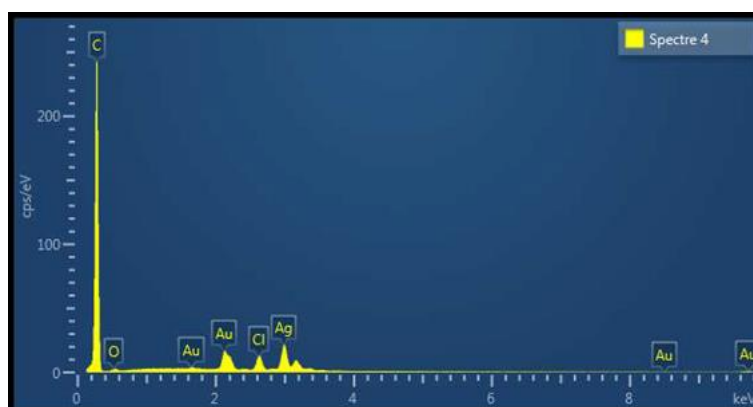

**Fig. S13.** EDX spectrum of the as-synthesized CP-AgAu-GR(H<sub>2</sub>O)-10min material.

Pulse electrodeposition conditions:  $R = n(\text{NH}_4\text{OH})/n(\text{AgNO}_3) = 4$ , 200 mM KNO<sub>3</sub>, 0.30 mM AgNO<sub>3</sub>,  $j_{\text{appl}} = -0.5 \text{ mA cm}^{-2}$ ;  $t_{\text{OFF}} = t_{\text{ON}} = 5 \text{ s}$ ;  $N_{\text{cycles}} = 252$  and temperature = 25 °C. Galvanic replacement (GR) conditions: MQ water, 487  $\mu\text{M}$  HAuCl<sub>4</sub>,  $t_{\text{GR}} = 10 \text{ min}$ , temperature = RT, gentle shaking. Please: Read “Spectre” as “Spectrum”.

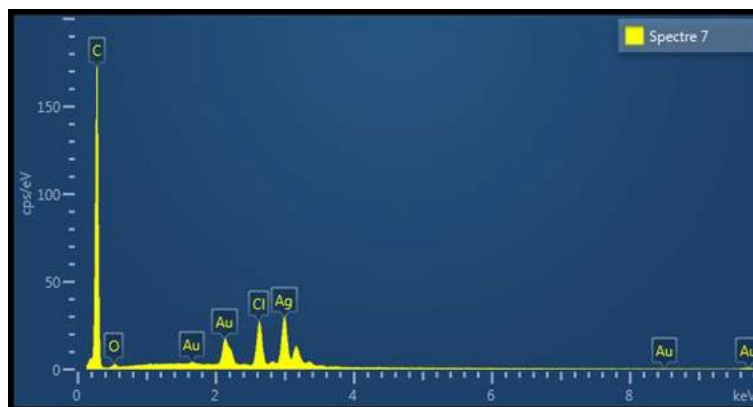

**Fig. S14.** EDX spectrum of the as-synthesized CP-AgAu-GR(H<sub>2</sub>O)-5min material.

Pulse electrodeposition conditions:  $R = n(\text{NH}_4\text{OH})/n(\text{AgNO}_3) = 4$ , 200 mM KNO<sub>3</sub>, 0.30 mM AgNO<sub>3</sub>,  $j_{\text{appl}} = -0.5 \text{ mA cm}^{-2}$ ;  $t_{\text{OFF}} = t_{\text{ON}} = 5 \text{ s}$ ;  $N_{\text{cycles}} = 252$  and temperature = 25 °C. Galvanic replacement (GR) conditions: MQ water, 487  $\mu\text{M}$  HAuCl<sub>4</sub>,  $t_{\text{GR}} = 5 \text{ min}$ , temperature = RT, gentle shaking. Please: Read “Spectre” as “Spectrum”.



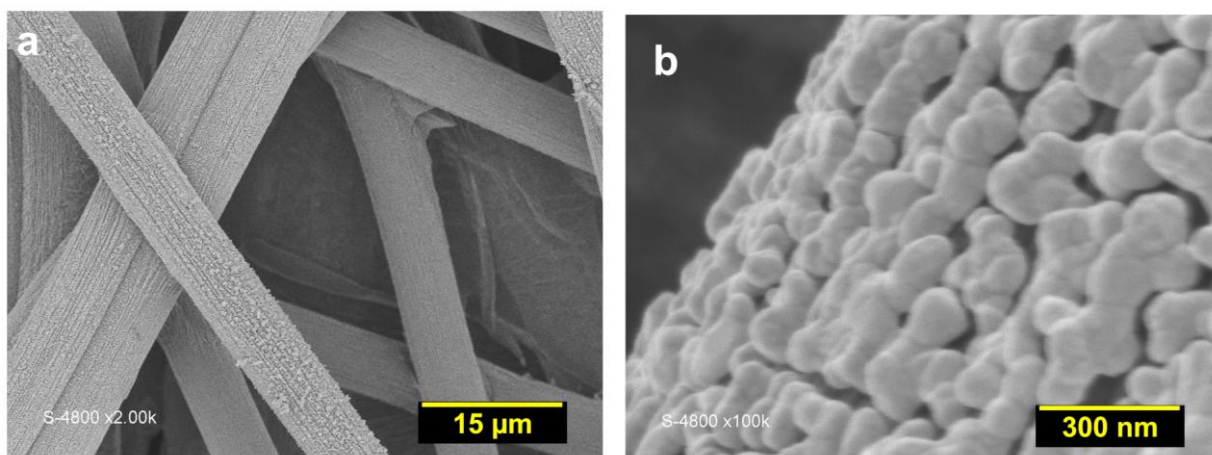

**Fig. S15.** SEM/HRSEM analysis of the as-synthesized GDL@Au materials referred to as “CP-Au”.

(a) SEM and (b) HRSEM

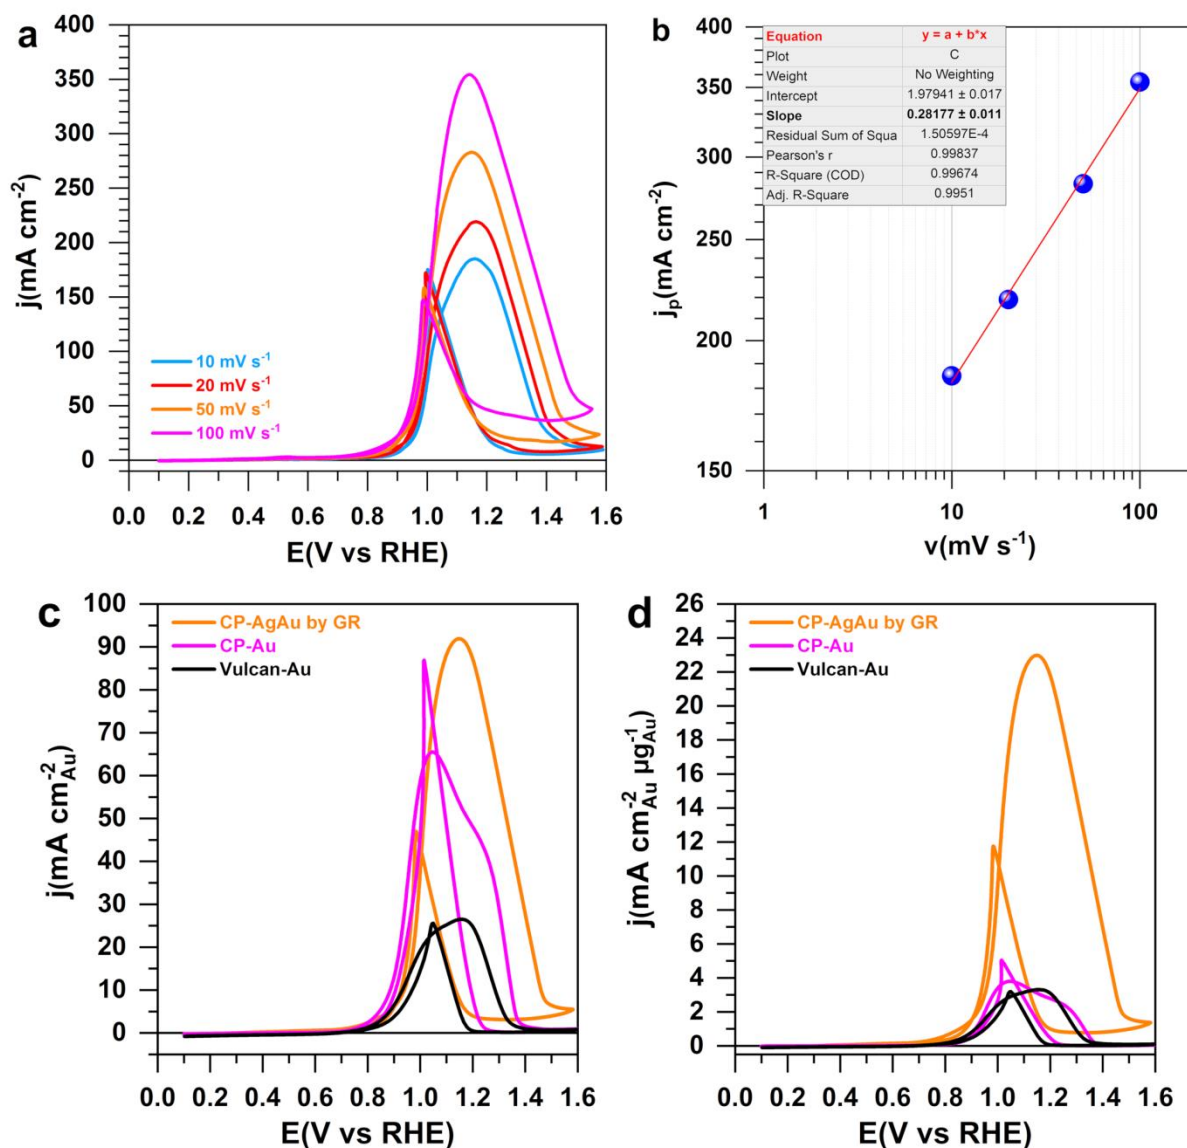

**Fig. S16.** Electrochemical characterization of the as-synthesized GD@AgAu material is the “CP-AgAu-GR(NaCl)-5min

(a) iR-free CVs in 1 M KOH + 0.1 glycerol at a temperature of 25 °C, and recorded at different scan rates. (b) Plot of “ $j_{\text{peak}}$ ” vs “ $\nu$ ” in log-log scale. (c) Normalized by the ECSA. (d) Normalized by both the ECSA and the Au weight.

#### Comments:

(1) The description of the CV of an organic molecule can be done by collecting CVs for different scan rates  $\nu = 1\text{--}200 \text{ mV s}^{-1}$  and by plotting  $\log(j_{\text{peak}})$  vs  $\log(\nu)$  where: (i) slope = 1 means that the reaction is limited by adsorption (reactants), (ii) slope = 0.5 means that the reaction is limited by diffusion (reactants and products), (iii) slope = 0.5–1 means that the reaction is limited by both adsorption and diffusion, and (iv) a slope < 0.5 is translated to as a

complex process (adsorption, diffusion, electron transfer). In the present case, the slope for the entire electrode materials is about 0.3, which falls in the last case. The result was expected since the glycerol electrooxidation reaction is a multi-proton and multi-electron transfer process so that the reactants diffusion, adsorption, products' diffusion and electrons transfer can simultaneously limit the overall reaction kinetic.

(2) the normalization of Figs. S17c-d is based on ECSA determined as following (in the blank electrolyte):

|                                              |                   |                 |                 |
|----------------------------------------------|-------------------|-----------------|-----------------|
| monolayer charge $Q_0(\mu\text{C cm}^{-2})$  | 482               |                 |                 |
| Scan rate ( $\text{mV s}^{-1}$ )             | 50                |                 |                 |
| Electrode name                               | CP-Au             | Vulcan-Au       | CP-AgAu         |
| electrode size ( $\text{cm}^2$ )             | 0.25              | 0.5             | 0.25            |
| metal (Au )loading ( $\mu\text{g cm}^{-2}$ ) | 69                | 16              | 16              |
| Au( $\mu\text{g}$ )                          | 17.25             | 8               | 4               |
| <b>Oxide reduction peak area (mA V)</b>      | <b>0.00782408</b> | <b>0.020356</b> | <b>0.018921</b> |
| $Q(\mu\text{C})$                             | 156.5             | 407.1           | 378.4           |
| ECSA( $\text{cm}^2$ )                        | 0.32              | 0.84            | 0.79            |
| ECSA( $\text{m}^2 \text{g}^{-1}$ )           | 1.9               | 10.6            | 19.6            |

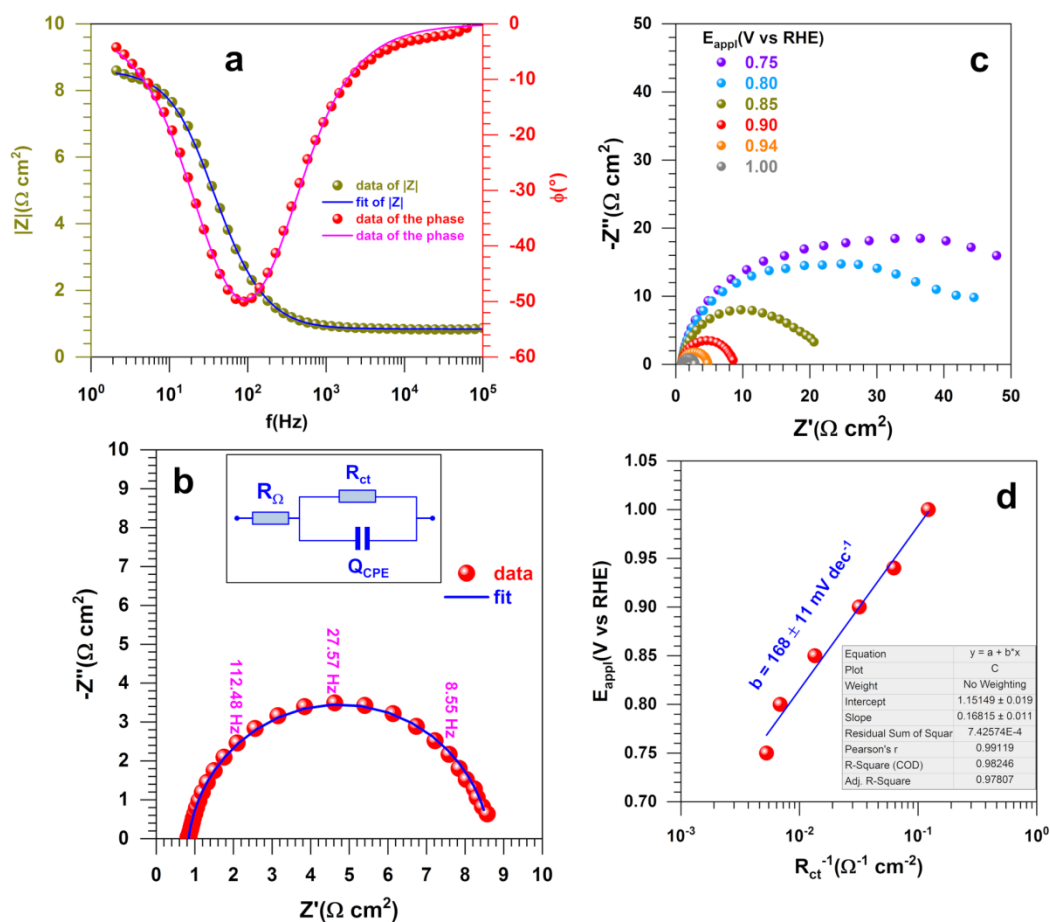

**Figure S17.** EIS characterization in 1 M KOH + 0.1 glycerol at 25 °C.

The as-synthesized GD@AgAu material is the “CP-AgAu-GR(NaCl)-5min”. (a) Bode diagrams for  $E_{\text{appl}} = 0.9$  V vs RHE. (b) Complex-plane Nyquist impedance plots for raw and fitted data (inset shows the used equivalent electrical circuit of  $R_\Omega + Q_{\text{CPE}} // R_{\text{ct}}$  for fitting) for  $E_{\text{appl}} = 0.9$  V vs RHE. (c) Nyquist impedance plots recorded at different electrode potentials. (d) Tafel plots by  $R_{\text{ct}}$ .

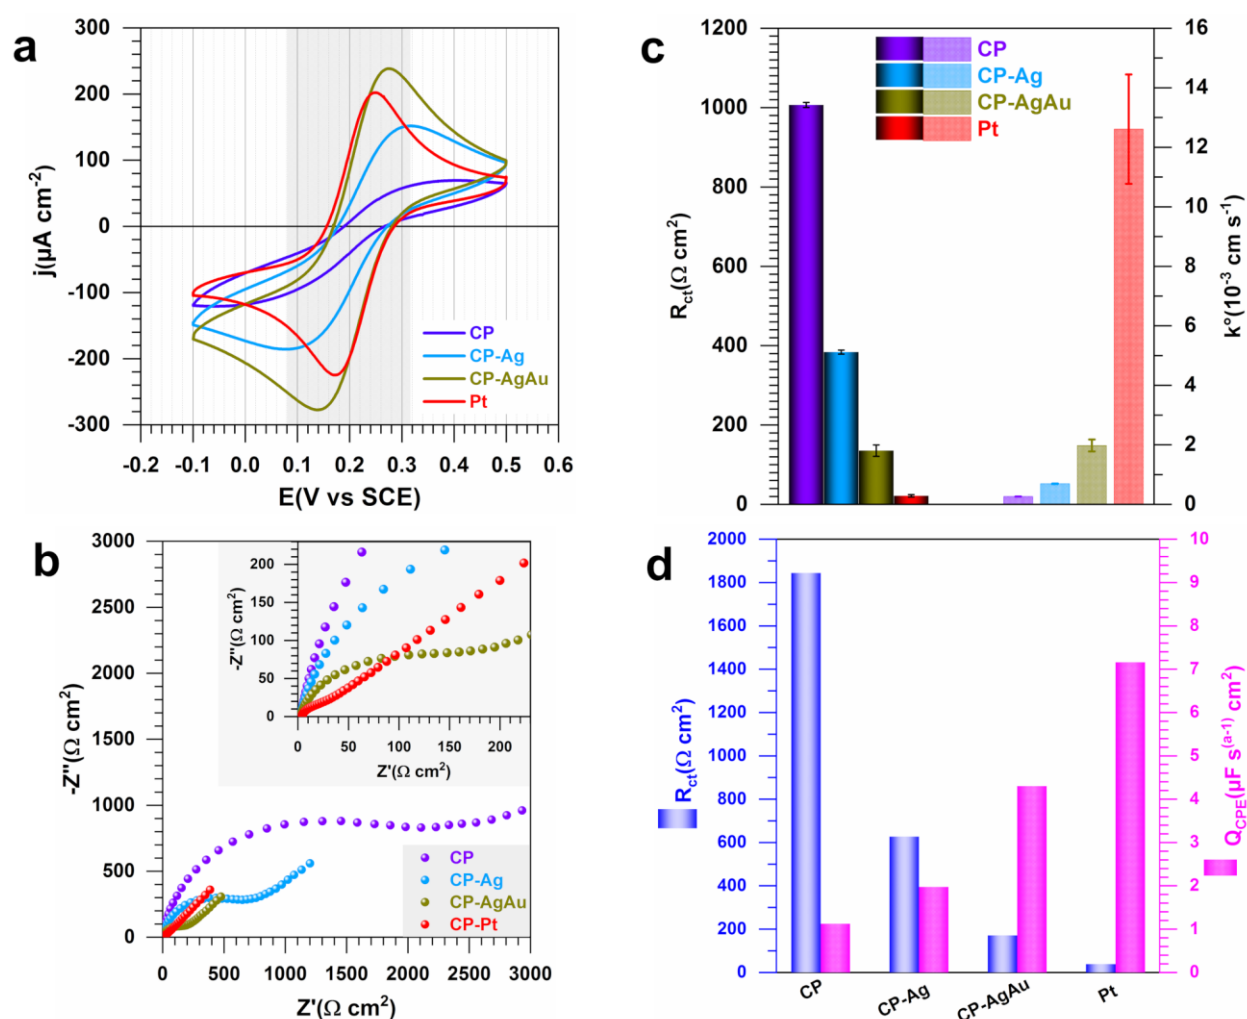

**Fig. S18.** Electrochemical characterization of the pristine CP, bulk Pt and the as-fabricated CP-Ag (GDE@Ag) and CP-AgAu (GDE@AuAg) materials in 0.5 M KNO<sub>3</sub> + 1 mM K<sub>3</sub>[Fe(CN)<sub>6</sub>] at 25 °C.

(a) iR-free CVs recorded at 100 mV s<sup>-1</sup>. (b) Complex-plane Nyquist impedance plots at  $E_{app} (= OCP) = 0.25 \pm 0.01$  V vs SCE. (c) The values of  $R_{ct}$  (left y-axis) and  $k^\circ$  (right y-axis) according to the method based on the peak-to-peak separation ( $\Delta E_p$ ) between the anodic and cathodic peaks on the CVs of panel (a) (see the detailed method in Figure S19): Error bars represent 1 SD ( $n = 3$ ). (d) The value of  $R_{ct}$  (left y-axis) and  $Q_{CPE}$  (right y-axis) according to the EIS method using “ $R_\Omega + Q_{CPE} // (R_{ct} + W)$ ” as a representative equivalent electrical circuit to fit data from panel (b). For CP-AgAu, the galvanic replacement (GR) was performed in a brine solution.

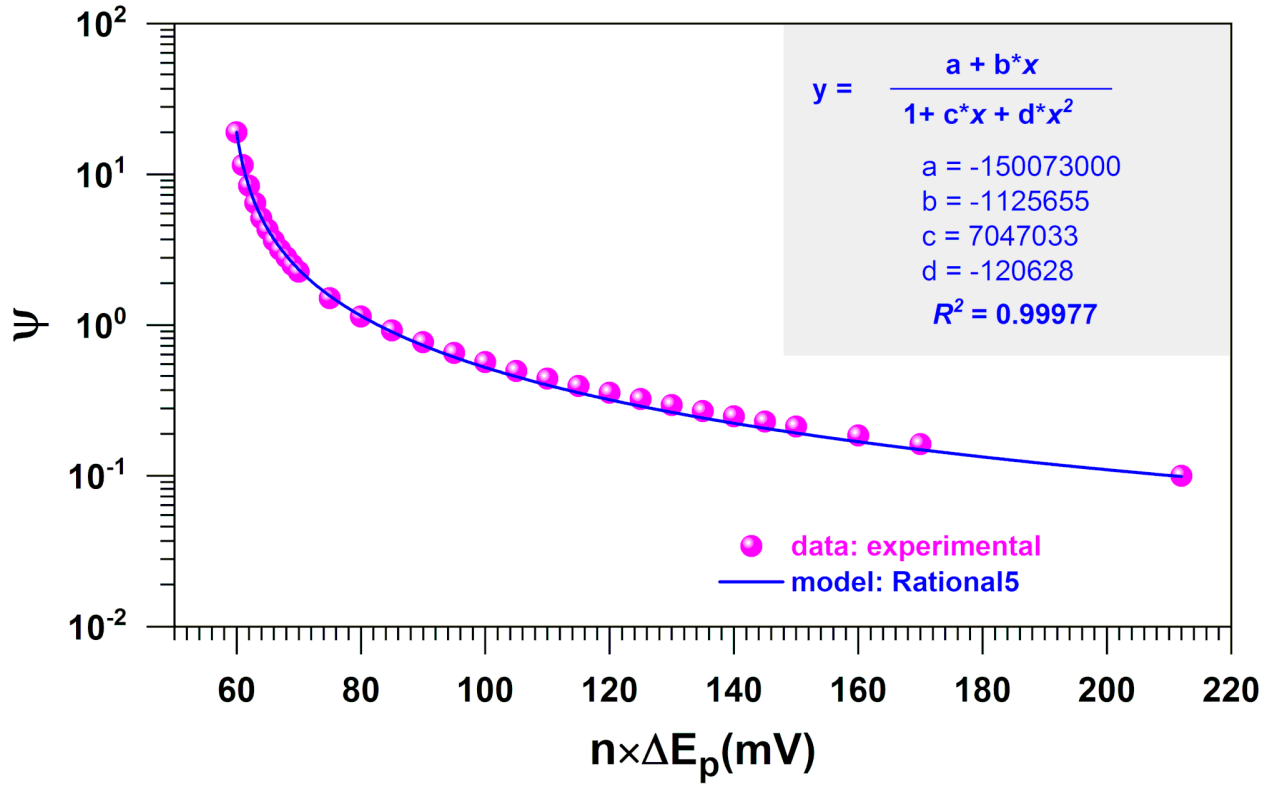

**Fig. S19.** Modeling curve of  $n \times \Delta E_p$  vs.  $\psi$  (log-scale for  $\psi$ ) for the determination of the kinetics data from the analysis of the peak separation,  $\Delta E_p$  between the anodic and cathodic peaks on a CV.

Experimental data were taken from refs.<sup>22,23</sup> Specifically, standard rate constant ( $k^\circ$ ), charge transfer resistance ( $R_{ct}$ ) and exchange current density ( $j_0$ ) were extracted from the relations explicated below.<sup>22-28</sup> Since  $\alpha$  is mostly in the range of 0.4-0.6 and  $D_{Ox}$  is closer to  $D_{Red}$ , hence, one can assume that  $\gamma^\alpha \approx 1$ .

$$k^\circ = \frac{\psi}{\left(\frac{D_{Ox}}{D_{Red}}\right)^\alpha \sqrt{\frac{RT}{\pi n \nu F D_{Ox}}}}$$

$$\gamma = \frac{D_{Ox}}{D_{Red}}$$

$$R_{ct} = \left[ \frac{RT}{(nF)^2 C} \right] \frac{1}{k^\circ}$$

$$j_0 = \left[ \frac{RT}{nF} \right] \frac{1}{R_{ct}} = [nFC] k^\circ$$

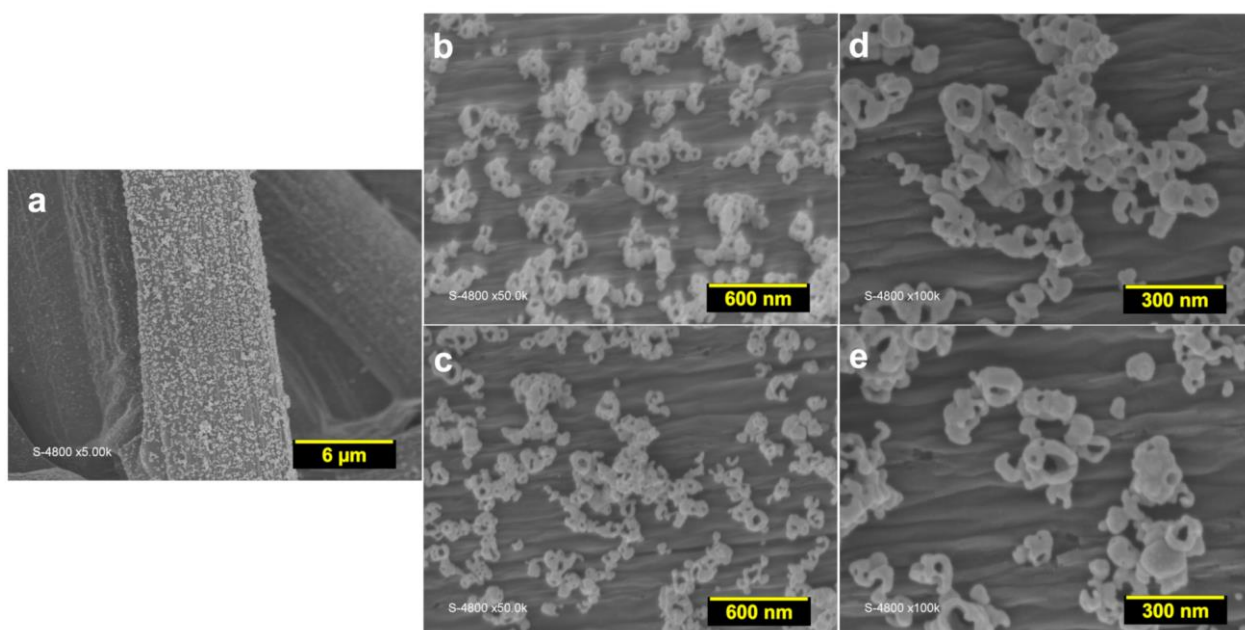

**Fig. S20.** SEM/HRSEM micrographs for the as-synthesized GDE@AgAu materials by the galvanic replacement (GR) performed in H<sub>2</sub>O (5 min) and subsequently washed with a brine solution, referred to as GR(H<sub>2</sub>O)-washed(NaCl)  
(a-e) SEM/HRSEM micrographs at different magnifications



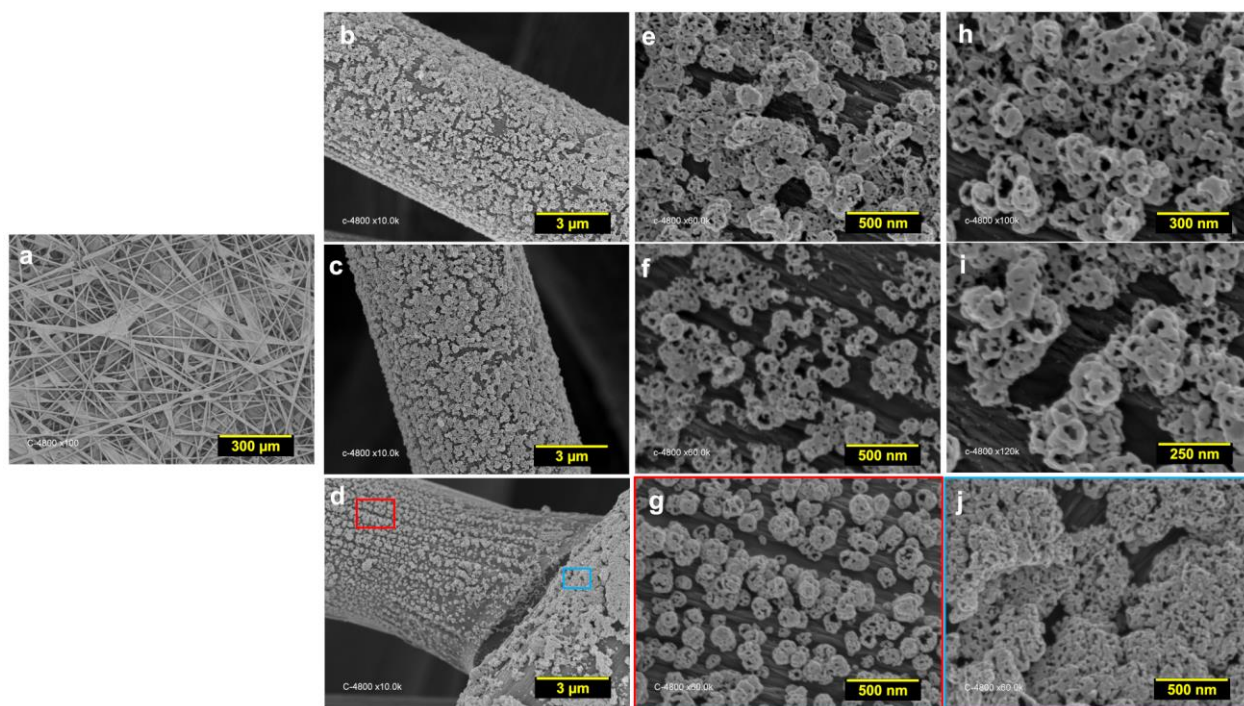

**Fig. S21.** SEM/HRSEM micrographs for the as-synthesized GDE@AgAu materials by the galvanic replacement (GR) performed in a brine solution (5 min), referred to as GR(NaCl). (a-j) SEM/HRSEM micrographs at different magnifications.



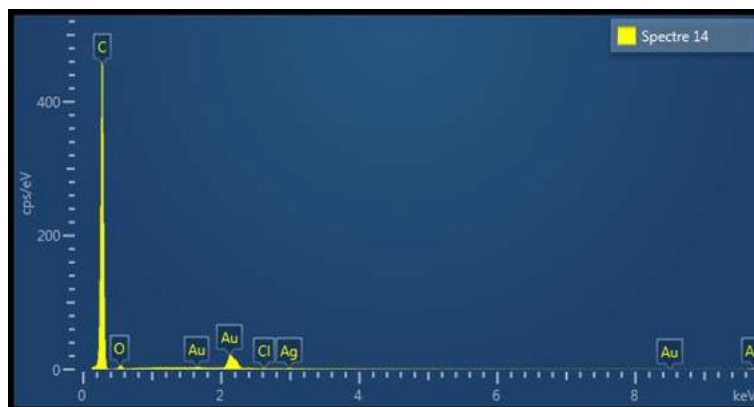

**Fig. S22.** EDX spectrum of the as-synthesized CP-AgAu-GR(H<sub>2</sub>O)-washed(NaCl)-5min material.

Pulse electrodeposition conditions:  $R = n(\text{NH}_4\text{OH})/n(\text{AgNO}_3) = 4$ , 200 mM KNO<sub>3</sub>, 0.30 mM AgNO<sub>3</sub>,  $j_{\text{appl}} = -0.5 \text{ mA cm}^{-2}$ ;  $t_{\text{OFF}} = t_{\text{ON}} = 5 \text{ s}$ ;  $N_{\text{cycles}} = 252$  and temperature = 25 °C. GR conditions: MQ water, 487  $\mu\text{M}$  HAuCl<sub>4</sub>,  $t_{\text{GR}} = 5 \text{ min}$ , temperature = RT, gentle shaking. Please: Read “Spectre” as “Spectrum”.

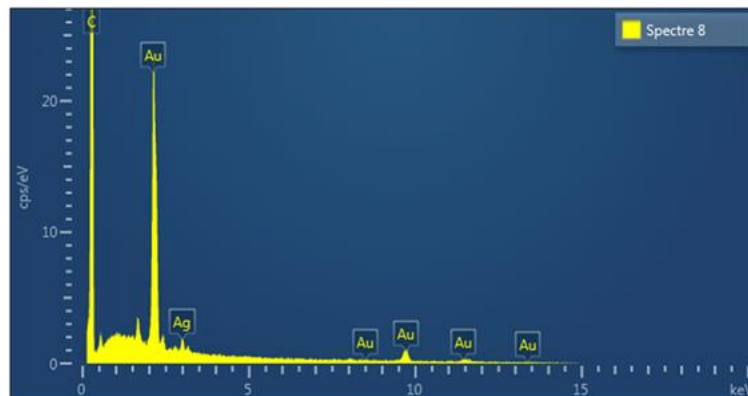

**Fig. S23.** EDX spectrum of the as-synthesized CP-AgAu-GR(NaCl)-5min material.

Pulse electrodeposition conditions:  $R = n(\text{NH}_4\text{OH})/n(\text{AgNO}_3) = 4$ , 200 mM KNO<sub>3</sub>, 0.30 mM AgNO<sub>3</sub>,  $j_{\text{appl}} = -0.5 \text{ mA cm}^{-2}$ ;  $t_{\text{OFF}} = t_{\text{ON}} = 5 \text{ s}$ ;  $N_{\text{cycles}} = 252$  and temperature = 25 °C. GR conditions: MQ water, 487  $\mu\text{M}$  HAuCl<sub>4</sub>,  $t_{\text{GR}} = 5 \text{ min}$ , temperature = RT, gentle shaking. Please: Read “Spectre” as “Spectrum”.

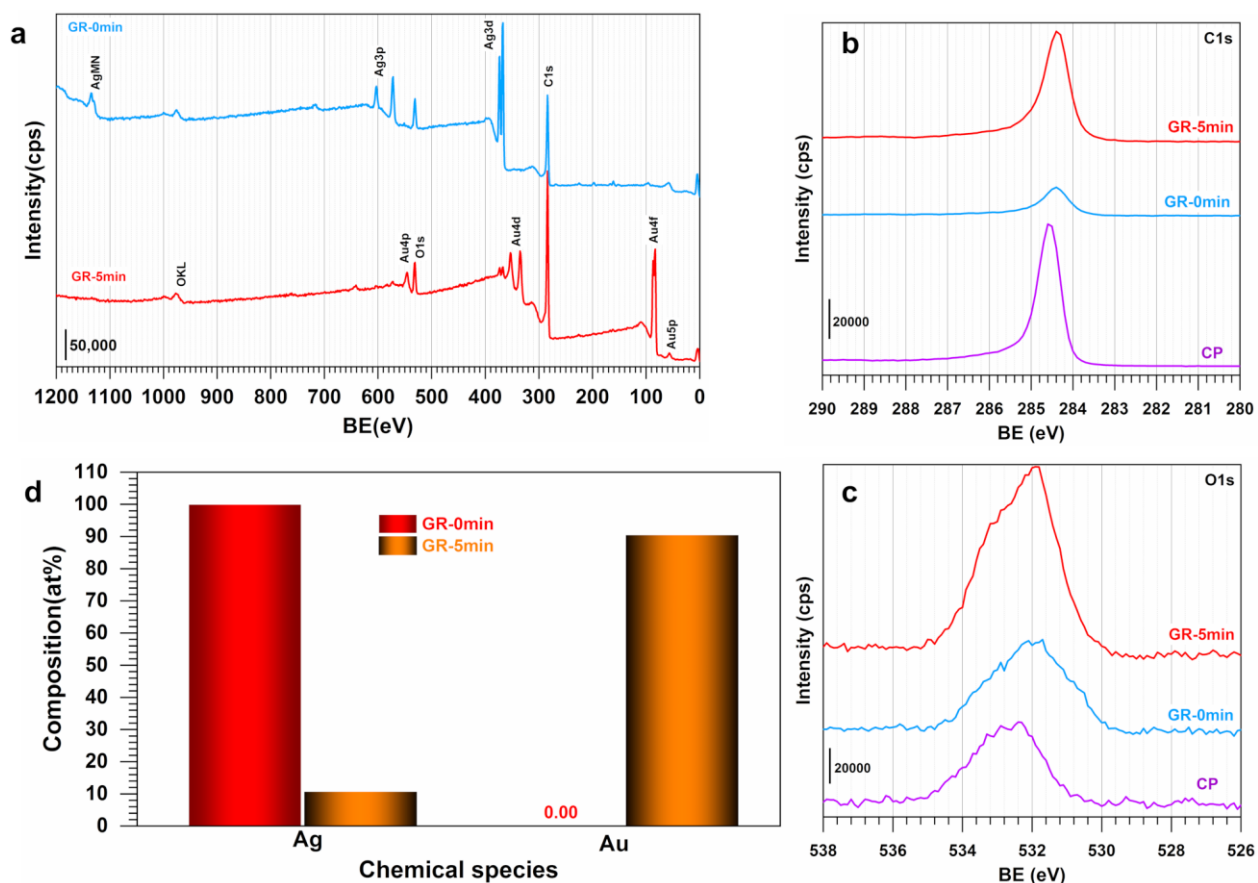

**Fig. S24.** XPS characterization of the as-prepared materials.

CP referred to as the GDE; GR-0 referred to as GDE@Ag, GR-5min referred to as GDE@AgAu obtained by the galvanic replacement (GR) performed in a brine solution, CP-Au is the control synthesis of monometallic. (a) Survey XPS spectra. (b) High-resolution XPS spectra of the C 1s core level. (c) High-resolution XPS spectra of the O 1s core level. (d) Quantitative data.

The absence of oxide peaks from XPS of Au 4f and Ag 3d endorses completely the conclusion that the majority of the observed oxygen is simply due to the starting materials of CP, which has been characterized by XPS elsewhere.<sup>2</sup>

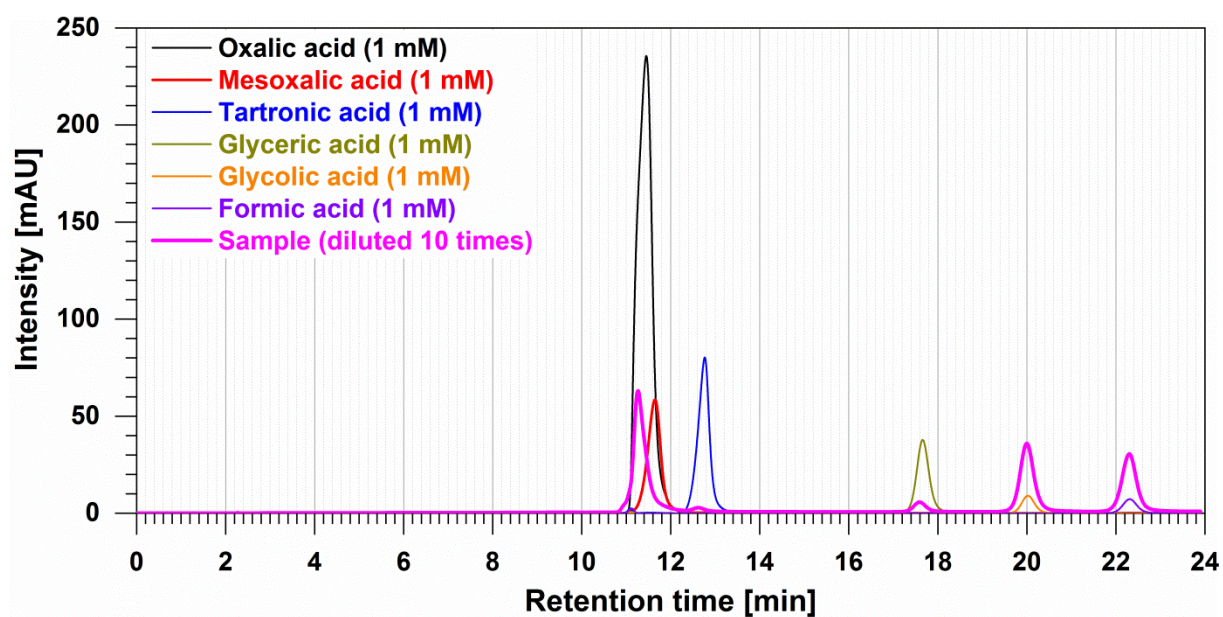

**Fig. S25.** Overview of the chromatograms obtained from HPLC analysis.

Eluent: 3 mM H<sub>2</sub>SO<sub>4</sub>; injection: 25  $\mu$ L; column BP-OA Benson 2000-0, 30 cm, at room temperature. External compounds at 1 mM and the sample (diluted 10 times) from the electrolysis at GDE@AgAu catalyst material obtained by GR in a brine solution.

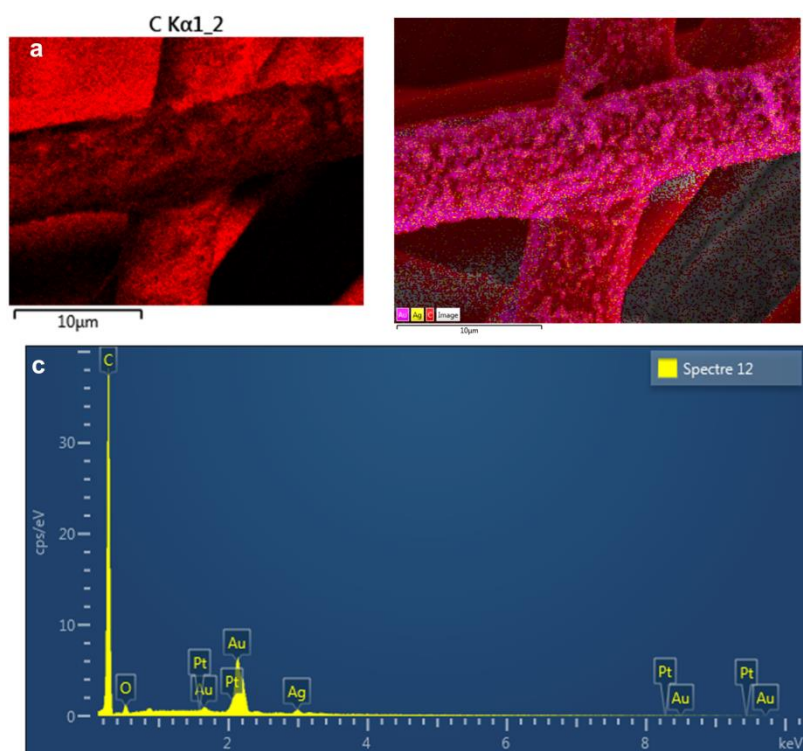

**Fig. S26.** Post-mortem SEM and EDX of the as-synthesized CP-AgAu-GR(NaCl)-5min material after 3 h of bulk electrolysis.

$E_{\text{applied}} = 0.3 \text{ V vs MOE} = 1.246 \text{ V vs RHE}$  with no iR-drop correction. Temperature = 25 °C. (a) EDX mapping of C. (b) EDX mapping of C+Ag+Au. (c) EDX spectrum. NB: Signal of Pt comes from the sample preparation to enhance the SEM/HRSEM imaging capability. Please: Read “Spectre” as “Spectrum”.

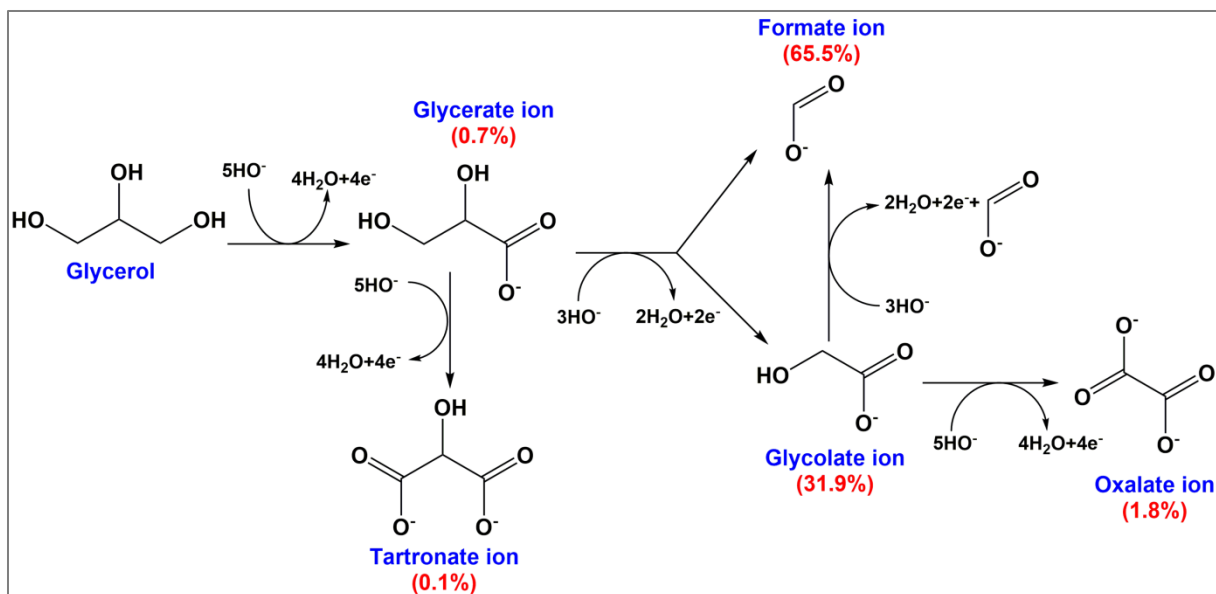

**Scheme S1.** Proposed reaction scheme for glycerol electrooxidation in alkaline medium on the as-synthesized silver-gold nanoporous and nanoalloyed nanocatalysts.

Numbers in red and in brackets indicate that the reaction product selectivity quantified by HPLC.

## References

1. Y. Holade, R. G. da Silva, K. Servat, T. W. Napporn, C. Canaff, A. R. De Andrade and K. B. Kokoh, *J. Mater. Chem. A*, 2016, **4**, 8337-8349.
2. M. Weber, N. Tuleushova, J. Zgheib, C. Lamboux, I. Iatsunskyi, E. Coy, V. Flaud, S. Tingry, D. Cornu, P. Miele, M. Bechelany and Y. Holade, *Appl. Catal. B: Env.*, 2019, **257**, 117917.
3. Y. Holade, C. Morais, K. Servat, T. W. Napporn and K. B. Kokoh, *ACS Catal.*, 2013, **3**, 2403-2411.
4. V. L. Oliveira, C. Morais, K. Servat, T. W. Napporn, G. Tremiliosi-Filho and K. B. Kokoh, *Electrochim. Acta*, 2014, **117**, 255-262.
5. V. L. Oliveira, C. Morais, K. Servat, T. W. Napporn, G. Tremiliosi-Filho and K. B. Kokoh, *J. Electroanal. Chem.*, 2013, **703**, 56-62.
6. Y. Kwon, K. J. P. Schouten and M. T. M. Koper, *ChemCatChem*, 2011, **3**, 1176-1185.
7. Z. Chen, C. Liu, X. Zhao, H. Yan, J. Li, P. Lyu, Y. Du, S. Xi, K. Chi, X. Chi, H. Xu, X. Li, W. Fu, K. Leng, S. J. Pennycook, S. Wang and K. P. Loh, *Adv. Mater.*, 2019, **31**, 1804763.
8. S. Li, J. Lai, R. Luque and G. Xu, *Energy Environ. Sci.*, 2016, **9**, 3097-3102.
9. W. Hong, C. Shang, J. Wang and E. Wang, *Energy Environ. Sci.*, 2015, **8**, 2910-2915.
10. Y. Zhou, Y. Shen and J. Xi, *Appl. Catal. B: Env.*, 2019, **245**, 604-612.
11. Y. Zhou, Y. Shen, J. Xi and X. Luo, *ACS Appl. Mater. Interfaces.*, 2019, **11**, 28953-28959.
12. H. Xu, J. Wei, M. Zhang, C. Wang, Y. Shiraishi, J. Guo and Y. Du, *J. Mater. Chem. A*, 2018, **6**, 24418-24424.
13. H. Xu, J. Wang, B. Yan, K. Zhang, S. Li, C. Wang, Y. Shiraishi, Y. Du and P. Yang, *Nanoscale*, 2017, **9**, 12996-13003.
14. A. Zalineeva, A. Serov, M. Padilla, U. Martinez, K. Artyushkova, S. Baranton, C. Coutanceau and P. B. Atanassov, *J. Am. Chem. Soc.*, 2014, **136**, 3937-3945.
15. L. M. Palma, T. S. Almeida, V. L. Oliveira, G. Tremiliosi-Filho, E. R. Gonzalez, A. R. de Andrade, K. Servat, C. Morais, T. W. Napporn and K. B. Kokoh, *RSC Adv.*, 2014, **4**, 64476-64483.
16. M. Simões, S. Baranton and C. Coutanceau, *Appl. Catal. B: Env.*, 2010, **93**, 354-362.

17. J. González-Cobos, S. Baranton and C. Coutanceau, *ChemElectroChem*, 2016, **3**, 1694-1704.
18. L. M. Palma, T. S. Almeida, C. Morais, T. W. Napporn, K. B. Kokoh and A. R. de Andrade, *ChemElectroChem*, 2017, **4**, 39-45.
19. A. Serov, U. Martinez and P. Atanasov, *Electrochem. Commun.*, 2013, **34**, 185-188.
20. D. Xu, Y. Liu, S. Zhao, Y. Lu, M. Han and J. Bao, *Chem. Commun.*, 2017, **53**, 1642-1645.
21. M. Weber, P. Collot, H. El Gaddari, S. Tingry, M. Bechelany and Y. Holade, *ChemElectroChem*, 2018, **5**, 743-747.
22. R. S. Nicholson, *Anal. Chem.*, 1965, **37**, 1351-1355.
23. J. Heinze, *Angew. Chem. Int. Ed.*, 1984, **23**, 831-847.
24. A. J. Bard and L. R. Faulkner, *Electrochemical Methods: Fundamentals and Applications*, John Wiley & Sons, Inc., USA, 2nd edn., 2001.
25. A. J. Bard and L. R. Faulkner, *Electrochemical Methods: Fundamentals and Applications*, John Wiley & Sons, Inc., USA, 1st edn., 1980.
26. E. Mahé, D. Devilliers and C. Comninellis, *Electrochim. Acta*, 2005, **50**, 2263-2277.
27. A. L. Eckermann, D. J. Feld, J. A. Shaw and T. J. Meade, *Coord. Chem. Rev.*, 2010, **254**, 1769-1802.
28. D. Salinas-Torres, F. Huerta, F. Montilla and E. Morallón, *Electrochim. Acta*, 2011, **56**, 2464-2470.
